# Supplementary material for: An Unusual Salmonella Enteritidis Strain Carrying a Modified Virulence Plasmid Lacking the prot6e Gene Represents a Geographically Widely Distributed Lineage
Source: Front Microbiol. 2020 Jun 17;11:1322. doi: 10.3389/fmicb.2020.01322 (PMC7311658; doi:10.3389/fmicb.2020.01322)
Supplement: Supplementary file 2 [file Table_2.XLSX]

## Sheet: Sheet1
p06D1274						p08D015						p08OTH027						p11OTH031						p12OTH012						p14OTH007						pSEN HG970000						pSLT AE006471.2
Feature_ID	Source	Location	Length	Description		Feature_ID	Source	Location	Length	Description		Feature_ID	Source	Location	Length	Description		Feature_ID	Source	Location	Length	Description		Feature_ID	Source	Location	Length	Description		Feature_ID	Source	Location	Length	Description		Feature_ID	Source	Location	Length	Description		Feature_ID	Source	Location	Length	Description
p06D1274_00001	Prodigal:2.6	1-978	978	RepFIB replication protein A		p08D015_00001	Prodigal:2.6	1-978	978	RepFIB replication protein A		p08OTH027_00001	Prodigal:2.6	1-978	978	RepFIB replication protein A		p11OTH031_00001	Prodigal:2.6	1-978	978	RepFIB replication protein A		p12OTH012_00001	Prodigal:2.6	1-978	978	RepFIB replication protein A		p14OTH007_00001	Prodigal:2.6	1-978	978	RepFIB replication protein A		pSEN_00001	Prodigal:2.6	1-978	978	RepFIB replication protein A		pSLT_00001	Prodigal:2.6	1-978	978	RepFIB replication protein A
p06D1274_00001	prokka	1-978	978	repB		p08D015_00001	prokka	1-978	978	repB		p08OTH027_00001	prokka	1-978	978	repB		p11OTH031_00001	prokka	1-978	978	repB		p12OTH012_00001	prokka	1-978	978	repB		p14OTH007_00001	prokka	1-978	978	repB		pSEN_00001	prokka	1-978	978	repB		pSLT_00001	prokka	1-978	978	repB
p06D1274_00002	Prodigal:2.6	1849-2058	210	Protein YgiW		p08D015_00002	Prodigal:2.6	1850-2059	210	Protein YgiW		p08OTH027_00002	Prodigal:2.6	1849-2058	210	Protein YgiW		p11OTH031_00002	Prodigal:2.6	1850-2059	210	Protein YgiW		p12OTH012_00002	Prodigal:2.6	1850-2059	210	Protein YgiW		p14OTH007_00002	Prodigal:2.6	1850-2059	210	Protein YgiW		pSEN_00002	Prodigal:2.6	1519-1905	387	Protein YgiW		pSLT_00002	Prodigal:2.6	1850-2059	210	Protein YgiW
p06D1274_00002	prokka	1849-2058	210	ygiW		p08D015_00002	prokka	1850-2059	210	ygiW		p08OTH027_00002	prokka	1849-2058	210	ygiW		p11OTH031_00002	prokka	1850-2059	210	ygiW		p12OTH012_00002	prokka	1850-2059	210	ygiW		p14OTH007_00002	prokka	1850-2059	210	ygiW		pSEN_00002	prokka	1519-1905	387	ygiW		pSLT_00002	prokka	1850-2059	210	ygiW
																																				pSEN_00002	SignalP:4.1	1846-1905	60	putative signal peptide
p06D1274_00003	Prodigal:2.6	2949-3251	303	Major pilu subunit operon regulatory protein PapB		p08D015_00003	Prodigal:2.6	2950-3252	303	Major pilu subunit operon regulatory protein PapB		p08OTH027_00003	Prodigal:2.6	2949-3251	303	Major pilu subunit operon regulatory protein PapB		p11OTH031_00003	Prodigal:2.6	2950-3252	303	Major pilu subunit operon regulatory protein PapB		p12OTH012_00003	Prodigal:2.6	2950-3252	303	Major pilu subunit operon regulatory protein PapB		p14OTH007_00003	Prodigal:2.6	2950-3252	303	Major pilu subunit operon regulatory protein PapB		pSEN_00003	Prodigal:2.6	2612-2914	303	Major pilu subunit operon regulatory protein PapB		pSLT_00003	Prodigal:2.6	2950-3252	303	Major pilu subunit operon regulatory protein PapB
p06D1274_00003	prokka	2949-3251	303	papB		p08D015_00003	prokka	2950-3252	303	papB		p08OTH027_00003	prokka	2949-3251	303	papB		p11OTH031_00003	prokka	2950-3252	303	papB		p12OTH012_00003	prokka	2950-3252	303	papB		p14OTH007_00003	prokka	2950-3252	303	papB		pSEN_00003	prokka	2612-2914	303	papB		pSLT_00003	prokka	2950-3252	303	papB
p06D1274_00004	Prodigal:2.6	3526-4044	519	Fimbrial protein [Escherichia coli]		p08D015_00004	Prodigal:2.6	3527-4045	519	Fimbrial protein [Escherichia coli]		p08OTH027_00004	Prodigal:2.6	3526-4044	519	Fimbrial protein [Escherichia coli]		p11OTH031_00004	Prodigal:2.6	3527-4045	519	Fimbrial protein [Escherichia coli]		p12OTH012_00004	Prodigal:2.6	3527-4045	519	Fimbrial protein [Escherichia coli]		p14OTH007_00004	Prodigal:2.6	3527-4045	519	Fimbrial protein [Escherichia coli]		pSEN_00004	Prodigal:2.6	3189-3713	525	Fimbrial protein [Salmonella enterica]		pSLT_00004	Prodigal:2.6	3527-4045	519	Fimbrial protein [Salmonella enterica]
p06D1274_00004	SignalP:4.1	3526-3591	66	putative signal peptide		p08D015_00004	SignalP:4.1	3527-3592	66	putative signal peptide		p08OTH027_00004	SignalP:4.1	3526-3591	66	putative signal peptide		p11OTH031_00004	SignalP:4.1	3527-3592	66	putative signal peptide		p12OTH012_00004	SignalP:4.1	3527-3592	66	putative signal peptide		p14OTH007_00004	SignalP:4.1	3527-3592	66	putative signal peptide		pSEN_00004	SignalP:4.1	3189-3254	66	putative signal peptide		pSLT_00004	SignalP:4.1	3527-3592	66	putative signal peptide
p06D1274_00004	prokka	3526-4044	519	No Prokka Description		p08D015_00004	prokka	3527-4045	519	No Prokka Description		p08OTH027_00004	prokka	3526-4044	519	No Prokka Description		p11OTH031_00004	prokka	3527-4045	519	No Prokka Description		p12OTH012_00004	prokka	3527-4045	519	No Prokka Description		p14OTH007_00004	prokka	3527-4045	519	No Prokka Description		pSEN_00004	prokka	3189-3713	525	No Prokka Description		pSLT_00004	prokka	3527-4045	519	No Prokka Description
p06D1274_00005	Prodigal:2.6	4272-6680	2409	Outer membrane usher protein FimD		p08D015_00005	Prodigal:2.6	4273-6681	2409	Outer membrane usher protein FimD		p08OTH027_00005	Prodigal:2.6	4272-6680	2409	Outer membrane usher protein FimD		p11OTH031_00005	Prodigal:2.6	4273-6681	2409	Outer membrane usher protein FimD		p12OTH012_00005	Prodigal:2.6	4273-6681	2409	Outer membrane usher protein FimD		p14OTH007_00005	Prodigal:2.6	4273-6681	2409	Outer membrane usher protein FimD		pSEN_00005	Prodigal:2.6	3940-6348	2409	Outer membrane usher protein FimD		pSLT_00005	Prodigal:2.6	4273-6681	2409	Outer membrane usher protein FimD
p06D1274_00005	SignalP:4.1	4272-4346	75	putative signal peptide		p08D015_00005	SignalP:4.1	4273-4347	75	putative signal peptide		p08OTH027_00005	SignalP:4.1	4272-4346	75	putative signal peptide		p11OTH031_00005	SignalP:4.1	4273-4347	75	putative signal peptide		p12OTH012_00005	SignalP:4.1	4273-4347	75	putative signal peptide		p14OTH007_00005	SignalP:4.1	4273-4347	75	putative signal peptide		pSEN_00005	SignalP:4.1	3940-4014	75	putative signal peptide		pSLT_00005	SignalP:4.1	4273-4347	75	putative signal peptide
p06D1274_00005	prokka	4272-6680	2409	fimD		p08D015_00005	prokka	4273-6681	2409	fimD		p08OTH027_00005	prokka	4272-6680	2409	fimD		p11OTH031_00005	prokka	4273-6681	2409	fimD		p12OTH012_00005	prokka	4273-6681	2409	fimD		p14OTH007_00005	prokka	4273-6681	2409	fimD		pSEN_00005	prokka	3940-6348	2409	fimD		pSLT_00005	prokka	4273-6681	2409	fimD
p06D1274_00006	Prodigal:2.6	6673-7365	693	Chaperone protein FaeE		p08D015_00006	Prodigal:2.6	6674-7366	693	Chaperone protein FaeE		p08OTH027_00006	Prodigal:2.6	6673-7365	693	Chaperone protein FaeE		p11OTH031_00006	Prodigal:2.6	6674-7366	693	Chaperone protein FaeE		p12OTH012_00006	Prodigal:2.6	6674-7366	693	Chaperone protein FaeE		p14OTH007_00006	Prodigal:2.6	6674-7366	693	Chaperone protein FaeE		pSEN_00006	Prodigal:2.6	6341-7033	693	Chaperone protein FaeE		pSLT_00006	Prodigal:2.6	6674-7366	693	Chaperone protein FaeE
p06D1274_00006	SignalP:4.1	6673-6744	72	putative signal peptide		p08D015_00006	SignalP:4.1	6674-6745	72	putative signal peptide		p08OTH027_00006	SignalP:4.1	6673-6744	72	putative signal peptide		p11OTH031_00006	SignalP:4.1	6674-6745	72	putative signal peptide		p12OTH012_00006	SignalP:4.1	6674-6745	72	putative signal peptide		p14OTH007_00006	SignalP:4.1	6674-6745	72	putative signal peptide		pSEN_00006	SignalP:4.1	6341-6412	72	putative signal peptide		pSLT_00006	SignalP:4.1	6674-6745	72	putative signal peptide
p06D1274_00006	prokka	6673-7365	693	faeE		p08D015_00006	prokka	6674-7366	693	faeE		p08OTH027_00006	prokka	6673-7365	693	faeE		p11OTH031_00006	prokka	6674-7366	693	faeE		p12OTH012_00006	prokka	6674-7366	693	faeE		p14OTH007_00006	prokka	6674-7366	693	faeE		pSEN_00006	prokka	6341-7033	693	faeE		pSLT_00006	prokka	6674-7366	693	faeE
p06D1274_00007	Prodigal:2.6	7380-7937	558	Membrane protein (plasmid) [Salmonella enterica subsp. enterica serovar Typhimurium]		p08D015_00007	Prodigal:2.6	7381-7938	558	Membrane protein (plasmid) [Salmonella enterica subsp. enterica serovar Typhimurium]		p08OTH027_00007	Prodigal:2.6	7380-7937	558	Membrane protein (plasmid) [Salmonella enterica subsp. enterica serovar Typhimurium]		p11OTH031_00007	Prodigal:2.6	7381-7938	558	Membrane protein (plasmid) [Salmonella enterica subsp. enterica serovar Typhimurium]		p12OTH012_00007	Prodigal:2.6	7381-7938	558	Membrane protein (plasmid) [Salmonella enterica subsp. enterica serovar Typhimurium]		p14OTH007_00007	Prodigal:2.6	7381-7938	558	Membrane protein (plasmid) [Salmonella enterica subsp. enterica serovar Typhimurium]		pSEN_00007	Prodigal:2.6	7051-7608	558	Membrane protein [Salmonella enterica]		pSLT_00007	Prodigal:2.6	7381-7938	558	Membrane protein [Salmonella enterica subsp. enterica serovar Typhimurium]
p06D1274_00007	SignalP:4.1	7380-7475	96	putative signal peptide		p08D015_00007	SignalP:4.1	7381-7476	96	putative signal peptide		p08OTH027_00007	SignalP:4.1	7380-7475	96	putative signal peptide		p11OTH031_00007	SignalP:4.1	7381-7476	96	putative signal peptide		p12OTH012_00007	SignalP:4.1	7381-7476	96	putative signal peptide		p14OTH007_00007	SignalP:4.1	7381-7476	96	putative signal peptide		pSEN_00007	prokka	7051-7608	558	No Prokka Description		pSLT_00007	SignalP:4.1	7381-7476	96	putative signal peptide
p06D1274_00007	prokka	7380-7937	558	No Prokka Description		p08D015_00007	prokka	7381-7938	558	No Prokka Description		p08OTH027_00007	prokka	7380-7937	558	No Prokka Description		p11OTH031_00007	prokka	7381-7938	558	No Prokka Description		p12OTH012_00007	prokka	7381-7938	558	No Prokka Description		p14OTH007_00007	prokka	7381-7938	558	No Prokka Description								pSLT_00007	prokka	7381-7938	558	No Prokka Description
																																				pSEN_00008	Prodigal:2.6	7704-8645	942	Prot6e [Salmonella enterica subsp. enterica serovar Enteritidis]
																																				pSEN_00008	prokka	7704-8645	942	No Prokka Description
p06D1274_00008	Prodigal:2.6	7977-8114	138	hypothetical protein		p08D015_00008	Prodigal:2.6	7978-8115	138	hypothetical protein		p08OTH027_00008	Prodigal:2.6	7977-8114	138	hypothetical protein		p11OTH031_00008	Prodigal:2.6	7978-8115	138	hypothetical protein		p12OTH012_00008	Prodigal:2.6	7978-8115	138	hypothetical protein		p14OTH007_00008	Prodigal:2.6	7978-8115	138	hypothetical protein								pSLT_00008	Prodigal:2.6	7978-8115	138	hypothetical protein
p06D1274_00008	prokka	7977-8114	138	No Prokka Description		p08D015_00008	prokka	7978-8115	138	No Prokka Description		p08OTH027_00008	prokka	7977-8114	138	No Prokka Description		p11OTH031_00008	prokka	7978-8115	138	No Prokka Description		p12OTH012_00008	prokka	7978-8115	138	No Prokka Description		p14OTH007_00008	prokka	7978-8115	138	No Prokka Description								pSLT_00008	prokka	7978-8115	138	No Prokka Description
p06D1274_00009	Prodigal:2.6	8190-9065	876	Membrane protein [Salmonella enterica]		p08D015_00009	Prodigal:2.6	8191-9066	876	Membrane protein [Salmonella enterica]		p08OTH027_00009	Prodigal:2.6	8190-9065	876	Membrane protein [Salmonella enterica]		p11OTH031_00009	Prodigal:2.6	8191-9066	876	Membrane protein [Salmonella enterica]		p12OTH012_00009	Prodigal:2.6	8191-9066	876	Membrane protein [Salmonella enterica]		p14OTH007_00009	Prodigal:2.6	8191-9066	876	Membrane protein [Salmonella enterica]								pSLT_00009	Prodigal:2.6	8191-9066	876	Membrane protein [Salmonella enterica]
p06D1274_00009	SignalP:4.1	8190-8261	72	putative signal peptide		p08D015_00009	SignalP:4.1	8191-8262	72	putative signal peptide		p08OTH027_00009	SignalP:4.1	8190-8261	72	putative signal peptide		p11OTH031_00009	SignalP:4.1	8191-8262	72	putative signal peptide		p12OTH012_00009	SignalP:4.1	8191-8262	72	putative signal peptide		p14OTH007_00009	SignalP:4.1	8191-8262	72	putative signal peptide								pSLT_00009	SignalP:4.1	8191-8262	72	putative signal peptide
p06D1274_00009	prokka	8190-9065	876	No Prokka Description		p08D015_00009	prokka	8191-9066	876	No Prokka Description		p08OTH027_00009	prokka	8190-9065	876	No Prokka Description		p11OTH031_00009	prokka	8191-9066	876	No Prokka Description		p12OTH012_00009	prokka	8191-9066	876	No Prokka Description		p14OTH007_00009	prokka	8191-9066	876	No Prokka Description								pSLT_00009	prokka	8191-9066	876	No Prokka Description
p06D1274_00010	Prodigal:2.6	9076-9189	114	hypothetical protein		p08D015_00010	Prodigal:2.6	9077-9190	114	hypothetical protein		p08OTH027_00010	Prodigal:2.6	9076-9189	114	hypothetical protein		p11OTH031_00010	Prodigal:2.6	9077-9190	114	hypothetical protein		p12OTH012_00010	Prodigal:2.6	9077-9190	114	hypothetical protein		p14OTH007_00010	Prodigal:2.6	9077-9190	114	hypothetical protein								pSLT_00010	Prodigal:2.6	9077-9190	114	hypothetical protein
p06D1274_00010	prokka	9076-9189	114	No Prokka Description		p08D015_00010	prokka	9077-9190	114	No Prokka Description		p08OTH027_00010	prokka	9076-9189	114	No Prokka Description		p11OTH031_00010	prokka	9077-9190	114	No Prokka Description		p12OTH012_00010	prokka	9077-9190	114	No Prokka Description		p14OTH007_00010	prokka	9077-9190	114	No Prokka Description								pSLT_00010	prokka	9077-9190	114	No Prokka Description
p06D1274_00011	Prodigal:2.6	9497-9709	213	Regulator [Salmonella enterica]		p08D015_00011	Prodigal:2.6	9498-9710	213	Regulator [Salmonella enterica]		p08OTH027_00011	Prodigal:2.6	9497-9709	213	Regulator [Salmonella enterica]		p11OTH031_00011	Prodigal:2.6	9498-9710	213	Regulator [Salmonella enterica]		p12OTH012_00011	Prodigal:2.6	9498-9710	213	Regulator [Salmonella enterica]		p14OTH007_00011	Prodigal:2.6	9498-9710	213	Regulator [Salmonella enterica]		pSEN_00009	Prodigal:2.6	8905-9117	213	Regulator [Salmonella enterica]		pSLT_00011	Prodigal:2.6	9498-9710	213	Regulator [Salmonella enterica]
p06D1274_00011	prokka	9497-9709	213	No Prokka Description		p08D015_00011	prokka	9498-9710	213	No Prokka Description		p08OTH027_00011	prokka	9497-9709	213	No Prokka Description		p11OTH031_00011	prokka	9498-9710	213	No Prokka Description		p12OTH012_00011	prokka	9498-9710	213	No Prokka Description		p14OTH007_00011	prokka	9498-9710	213	No Prokka Description		pSEN_00009	prokka	8905-9117	213	No Prokka Description		pSLT_00011	prokka	9498-9710	213	No Prokka Description
p06D1274_00012	Prodigal:2.6	9694-10044	351	Transcriptional regulatory protein RcsB		p08D015_00012	Prodigal:2.6	9695-10045	351	Transcriptional regulatory protein RcsB		p08OTH027_00012	Prodigal:2.6	9694-10044	351	Transcriptional regulatory protein RcsB		p11OTH031_00012	Prodigal:2.6	9695-10045	351	Transcriptional regulatory protein RcsB		p12OTH012_00012	Prodigal:2.6	9695-10045	351	Transcriptional regulatory protein RcsB		p14OTH007_00012	Prodigal:2.6	9695-10045	351	Transcriptional regulatory protein RcsB		pSEN_00010	Prodigal:2.6	9102-9452	351	Transcriptional regulatory protein RcsB		pSLT_00012	Prodigal:2.6	9695-10045	351	Transcriptional regulatory protein RcsB
p06D1274_00012	prokka	9694-10044	351	rcsB		p08D015_00012	prokka	9695-10045	351	rcsB		p08OTH027_00012	prokka	9694-10044	351	rcsB		p11OTH031_00012	prokka	9695-10045	351	rcsB		p12OTH012_00012	prokka	9695-10045	351	rcsB		p14OTH007_00012	prokka	9695-10045	351	rcsB		pSEN_00010	prokka	9102-9452	351	rcsB		pSLT_00012	prokka	9695-10045	351	rcsB
																																				pSEN_00011	Prodigal:2.6	9431-9574	144	putative protein [Salmonella enterica subsp. enterica]
																																				pSEN_00011	prokka	9431-9574	144	No Prokka Description
p06D1274_00013	Prodigal:2.6	10371-10943	573	Thiol:disulfide interchange protein [Salmonella enterica]								p08OTH027_00013	Prodigal:2.6	10289-10942	654	Thiol:disulfide interchange protein [Salmonella enterica]		p11OTH031_00013	Prodigal:2.6	10290-10529	240	Thiol:disulfide interchange protein [Salmonella enterica]		p12OTH012_00013	Prodigal:2.6	10290-10727	438	Thiol:disulfide interchange protein [Salmonella enterica]		p14OTH007_00013	Prodigal:2.6	10290-10943	654	Thiol:disulfide interchange protein [Salmonella enterica]		pSEN_00012	Prodigal:2.6	9696-10352	657	Thiol:disulfide interchange protein DsbA		pSLT_00013	Prodigal:2.6	10290-10943	654	Thiol:disulfide interchange protein DsbA
p06D1274_00013	prokka	10371-10943	573	No Prokka Description								p08OTH027_00013	prokka	10289-10942	654	No Prokka Description		p11OTH031_00013	prokka	10290-10529	240	No Prokka Description		p12OTH012_00013	prokka	10290-10727	438	No Prokka Description		p14OTH007_00013	prokka	10290-10943	654	No Prokka Description		pSEN_00012	SignalP:4.1	9696-9791	96	putative signal peptide		pSLT_00013	prokka	10290-10943	654	dsbA
																		p11OTH031_00014	Prodigal:2.6	10593-10940	348	Thiol:disulfide interchange protein DsbA														pSEN_00012	prokka	9696-10352	657	dsbA
																		p11OTH031_00014	prokka	10593-10940	348	dsbA
p06D1274_00014	Prodigal:2.6	10894-11079	186	putative protein [Salmonella enterica subsp. enterica serovar Typhi]		p08D015_00013	Prodigal:2.6	10888-11142	255	putative protein [Salmonella enterica subsp. enterica serovar Typhi]		p08OTH027_00014	Prodigal:2.6	10893-11078	186	putative protein [Salmonella enterica subsp. enterica serovar Typhi]		p11OTH031_00015	Prodigal:2.6	10891-11076	186	putative protein [Salmonella enterica subsp. enterica serovar Typhi]								p14OTH007_00014	Prodigal:2.6	10894-11079	186	putative protein [Salmonella enterica subsp. enterica serovar Typhi]		pSEN_00013	Prodigal:2.6	10303-10488	186	putative protein [Salmonella enterica subsp. enterica serovar Typhi]		pSLT_00014	Prodigal:2.6	10894-11079	186	putative protein [Salmonella enterica subsp. enterica serovar Typhi]
p06D1274_00014	prokka	10894-11079	186	No Prokka Description		p08D015_00013	prokka	10888-11142	255	No Prokka Description		p08OTH027_00014	prokka	10893-11078	186	No Prokka Description		p11OTH031_00015	prokka	10891-11076	186	No Prokka Description								p14OTH007_00014	prokka	10894-11079	186	No Prokka Description		pSEN_00013	prokka	10303-10488	186	No Prokka Description		pSLT_00014	prokka	10894-11079	186	No Prokka Description
p06D1274_00015	Prodigal:2.6	11130-11975	846	putative protein YjiK		p08D015_00014	Prodigal:2.6	11237-11491	255	putative protein YjiK		p08OTH027_00015	Prodigal:2.6	11129-11974	846	putative protein YjiK		p11OTH031_00016	Prodigal:2.6	11127-11615	489	putative protein YjiK		p12OTH012_00014	Prodigal:2.6	11331-11951	621	putative protein YjiK		p14OTH007_00015	Prodigal:2.6	11130-11975	846	putative protein YjiK		pSEN_00014	Prodigal:2.6	10539-11384	846	putative protein YjiK		pSLT_00015	Prodigal:2.6	11076-11975	900	putative protein YjiK
p06D1274_00015	prokka	11130-11975	846	yjiK		p08D015_00014	prokka	11237-11491	255	yjiK_1		p08OTH027_00015	prokka	11129-11974	846	yjiK		p11OTH031_00016	SignalP:4.1	11127-11189	63	putative signal peptide		p12OTH012_00014	prokka	11331-11951	621	yjiK		p14OTH007_00015	prokka	11130-11975	846	yjiK		pSEN_00014	prokka	10539-11384	846	yjiK		pSLT_00015	prokka	11076-11975	900	yjiK
						p08D015_00015	Prodigal:2.6	11445-11606	162	hypothetical protein								p11OTH031_00016	prokka	11127-11615	489	yjiK_1
						p08D015_00015	prokka	11445-11606	162	No Prokka Description								p11OTH031_00017	Prodigal:2.6	11615-11974	360	putative protein YjiK
						p08D015_00016	Prodigal:2.6	11560-11964	405	putative protein YjiK								p11OTH031_00017	prokka	11615-11974	360	yjiK_2
						p08D015_00016	prokka	11560-11964	405	yjiK_2
p06D1274_00016	Prodigal:2.6	12065-12622	558	Attachment invasion locus protein		p08D015_00017	Prodigal:2.6	12054-12611	558	Attachment invasion locus protein		p08OTH027_00016	Prodigal:2.6	12064-12621	558	Attachment invasion locus protein		p11OTH031_00018	Prodigal:2.6	12064-12621	558	Attachment invasion locus protein		p12OTH012_00015	Prodigal:2.6	12041-12598	558	Attachment invasion locus protein		p14OTH007_00016	Prodigal:2.6	12065-12622	558	Attachment invasion locus protein		pSEN_00015	Prodigal:2.6	11474-12031	558	Attachment invasion locus protein		pSLT_00016	Prodigal:2.6	12065-12622	558	Attachment invasion locus protein
p06D1274_00016	SignalP:4.1	12065-12139	75	putative signal peptide		p08D015_00017	SignalP:4.1	12054-12128	75	putative signal peptide		p08OTH027_00016	SignalP:4.1	12064-12138	75	putative signal peptide		p11OTH031_00018	SignalP:4.1	12064-12138	75	putative signal peptide		p12OTH012_00015	SignalP:4.1	12041-12115	75	putative signal peptide		p14OTH007_00016	SignalP:4.1	12065-12139	75	putative signal peptide		pSEN_00015	SignalP:4.1	11474-11548	75	putative signal peptide		pSLT_00016	SignalP:4.1	12065-12139	75	putative signal peptide
p06D1274_00016	prokka	12065-12622	558	ail		p08D015_00017	prokka	12054-12611	558	ail		p08OTH027_00016	prokka	12064-12621	558	ail		p11OTH031_00018	prokka	12064-12621	558	ail		p12OTH012_00015	prokka	12041-12598	558	ail		p14OTH007_00016	prokka	12065-12622	558	ail		pSEN_00015	prokka	11474-12031	558	ail		pSLT_00016	prokka	12065-12622	558	ail
p06D1274_00017	Prodigal:2.6	12889-13647	759	HTH-type transcriptional regulator GadX		p08D015_00018	Prodigal:2.6	12878-13636	759	HTH-type transcriptional regulator GadX		p08OTH027_00017	Prodigal:2.6	13156-13644	489	HTH-type transcriptional regulator GadX		p11OTH031_00019	Prodigal:2.6	12888-13646	759	HTH-type transcriptional regulator GadX		p12OTH012_00016	Prodigal:2.6	12865-13623	759	HTH-type transcriptional regulator GadX		p14OTH007_00017	Prodigal:2.6	12889-13647	759	HTH-type transcriptional regulator GadX		pSEN_00016	Prodigal:2.6	12297-13043	747	HTH-type transcriptional regulator GadX		pSLT_00017	Prodigal:2.6	12889-13647	759	HTH-type transcriptional regulator GadX
p06D1274_00017	prokka	12889-13647	759	gadX		p08D015_00018	prokka	12878-13636	759	gadX		p08OTH027_00017	prokka	13156-13644	489	gadX		p11OTH031_00019	prokka	12888-13646	759	gadX		p12OTH012_00016	prokka	12865-13623	759	gadX		p14OTH007_00017	prokka	12889-13647	759	gadX		pSEN_00016	prokka	12297-13043	747	gadX		pSLT_00017	prokka	12889-13647	759	gadX
p06D1274_00018	Prodigal:2.6	13634-13882	249	hypothetical protein								p08OTH027_00018	Prodigal:2.6	13631-13879	249	hypothetical protein
p06D1274_00018	prokka	13634-13882	249	No Prokka Description								p08OTH027_00018	prokka	13631-13879	249	No Prokka Description
p06D1274_00019	Prodigal:2.6	14119-14457	339	putative protein [Salmonella enterica subsp. arizonae]		p08D015_00019	Prodigal:2.6	14110-14448	339	putative protein [Salmonella enterica subsp. arizonae]		p08OTH027_00019	Prodigal:2.6	14116-14454	339	putative protein [Salmonella enterica subsp. arizonae]		p11OTH031_00020	Prodigal:2.6	14120-14458	339	putative protein [Salmonella enterica subsp. arizonae]		p12OTH012_00017	Prodigal:2.6	14097-14435	339	putative protein [Salmonella enterica subsp. arizonae]		p14OTH007_00018	Prodigal:2.6	14121-14459	339	putative protein [Salmonella enterica subsp. arizonae]
p06D1274_00019	prokka	14119-14457	339	No Prokka Description		p08D015_00019	prokka	14110-14448	339	No Prokka Description		p08OTH027_00019	prokka	14116-14454	339	No Prokka Description		p11OTH031_00020	prokka	14120-14458	339	No Prokka Description		p12OTH012_00017	prokka	14097-14435	339	No Prokka Description		p14OTH007_00018	prokka	14121-14459	339	No Prokka Description
p06D1274_00020	Prodigal:2.6	14823-15692	870	Incfii family plasmid replication initiator RepA [Salmonella enterica]		p08D015_00020	Prodigal:2.6	14814-15683	870	Incfii family plasmid replication initiator RepA [Salmonella enterica]		p08OTH027_00020	Prodigal:2.6	14820-15689	870	Incfii family plasmid replication initiator RepA [Salmonella enterica]		p11OTH031_00021	Prodigal:2.6	14824-15693	870	Incfii family plasmid replication initiator RepA [Salmonella enterica]		p12OTH012_00018	Prodigal:2.6	14901-15671	771	Incfii family plasmid replication initiator RepA [Salmonella enterica]		p14OTH007_00019	Prodigal:2.6	14825-15694	870	Incfii family plasmid replication initiator RepA [Salmonella enterica]		pSEN_00017	Prodigal:2.6	14217-15086	870	Incfii family plasmid replication initiator RepA [Salmonella enterica]		pSLT_00018	Prodigal:2.6	14825-15694	870	Incfii family plasmid replication initiator RepA [Salmonella enterica]
p06D1274_00020	prokka	14823-15692	870	No Prokka Description		p08D015_00020	prokka	14814-15683	870	No Prokka Description		p08OTH027_00020	prokka	14820-15689	870	No Prokka Description		p11OTH031_00021	prokka	14824-15693	870	No Prokka Description		p12OTH012_00018	prokka	14901-15671	771	No Prokka Description		p14OTH007_00019	prokka	14825-15694	870	No Prokka Description		pSEN_00017	prokka	14217-15086	870	No Prokka Description		pSLT_00018	prokka	14825-15694	870	No Prokka Description
p06D1274_00021	Infernal:1.1	15780-15869	90	CopA		p08D015_00021	Infernal:1.1	15771-15860	90	CopA		p08OTH027_00021	Infernal:1.1	15777-15866	90	CopA		p11OTH031_00022	Infernal:1.1	15781-15870	90	CopA		p12OTH012_00019	Infernal:1.1	15759-15848	90	CopA		p14OTH007_00020	Infernal:1.1	15782-15871	90	CopA		pSEN_00018	Infernal:1.1	15174-15263	90	CopA		pSLT_00019	Infernal:1.1	15782-15871	90	CopA
p06D1274_00021	prokka	15780-15869	90	No Prokka Description		p08D015_00021	prokka	15771-15860	90	No Prokka Description		p08OTH027_00021	prokka	15777-15866	90	No Prokka Description		p11OTH031_00022	prokka	15781-15870	90	No Prokka Description		p12OTH012_00019	prokka	15759-15848	90	No Prokka Description		p14OTH007_00020	prokka	15782-15871	90	No Prokka Description		pSEN_00018	prokka	15174-15263	90	No Prokka Description		pSLT_00019	prokka	15782-15871	90	No Prokka Description
p06D1274_00022	Prodigal:2.6	16012-16257	246	Replication regulatory protein RepA [Salmonella enterica]		p08D015_00022	Prodigal:2.6	16003-16248	246	Replication regulatory protein RepA [Salmonella enterica]		p08OTH027_00022	Prodigal:2.6	16009-16254	246	Replication regulatory protein RepA [Salmonella enterica]		p11OTH031_00023	Prodigal:2.6	16013-16258	246	Replication regulatory protein RepA [Salmonella enterica]		p12OTH012_00020	Prodigal:2.6	15991-16236	246	Replication regulatory protein RepA [Salmonella enterica]		p14OTH007_00021	Prodigal:2.6	16014-16259	246	Replication regulatory protein RepA [Salmonella enterica]		pSEN_00019	Prodigal:2.6	15406-15651	246	Replication regulatory protein RepA [Salmonella enterica]		pSLT_00020	Prodigal:2.6	16014-16259	246	Replication regulatory protein RepA [Salmonella enterica]
p06D1274_00022	prokka	16012-16257	246	No Prokka Description		p08D015_00022	prokka	16003-16248	246	No Prokka Description		p08OTH027_00022	prokka	16009-16254	246	No Prokka Description		p11OTH031_00023	prokka	16013-16258	246	No Prokka Description		p12OTH012_00020	prokka	15991-16236	246	No Prokka Description		p14OTH007_00021	prokka	16014-16259	246	No Prokka Description		pSEN_00019	prokka	15406-15651	246	No Prokka Description		pSLT_00020	prokka	16014-16259	246	No Prokka Description
p06D1274_00023	Prodigal:2.6	16457-16780	324	Phospholipase D		p08D015_00023	Prodigal:2.6	16448-16627	180	hypothetical protein		p08OTH027_00023	Prodigal:2.6	16454-16633	180	hypothetical protein		p11OTH031_00024	Prodigal:2.6	16458-16769	312	Phospholipase D		p12OTH012_00021	Prodigal:2.6	16436-16615	180	hypothetical protein		p14OTH007_00022	Prodigal:2.6	16459-16776	318	Phospholipase D		pSEN_00020	Prodigal:2.6	15851-16030	180	Phospholipase [Salmonella enterica]		pSLT_00021	Prodigal:2.6	16459-16773	315	Phospholipase D
p06D1274_00023	prokka	16457-16780	324	pld		p08D015_00023	prokka	16448-16627	180	No Prokka Description		p08OTH027_00023	prokka	16454-16633	180	No Prokka Description		p11OTH031_00024	prokka	16458-16769	312	pld		p12OTH012_00021	prokka	16436-16615	180	No Prokka Description		p14OTH007_00022	prokka	16459-16776	318	pld		pSEN_00020	prokka	15851-16030	180	No Prokka Description		pSLT_00021	prokka	16459-16773	315	pld
						p08D015_00024	Prodigal:2.6	16644-16754	111	hypothetical protein																										pSEN_00021	Prodigal:2.6	16047-16331	285	Phospholipase D family protein [Enterobacter sp. NFIX58]		pSLT_00022	Prodigal:2.6	16773-16946	174	Phospholipase D family protein [Erwinia typographi]
						p08D015_00024	prokka	16644-16754	111	No Prokka Description																										pSEN_00021	prokka	16047-16331	285	No Prokka Description		pSLT_00022	prokka	16773-16946	174	No Prokka Description
																																				pSEN_00021	SignalP:4.1	16248-16331	84	putative signal peptide		pSLT_00022	SignalP:4.1	16863-16946	84	putative signal peptide
p06D1274_00024	Prodigal:2.6	17075-17236	162	Disulfide bond formation protein DsbA [Salmonella enterica]		p08D015_00025	Prodigal:2.6	17049-17210	162	Disulfide bond formation protein DsbA [Salmonella enterica]		p08OTH027_00024	Prodigal:2.6	17071-17232	162	Disulfide bond formation protein DsbA [Salmonella enterica]		p11OTH031_00025	Prodigal:2.6	17064-17225	162	Disulfide bond formation protein DsbA [Salmonella enterica]		p12OTH012_00022	Prodigal:2.6	17042-17203	162	Disulfide bond formation protein DsbA [Salmonella enterica]		p14OTH007_00023	Prodigal:2.6	17071-17232	162	Disulfide bond formation protein DsbA [Salmonella enterica]		pSEN_00022	Prodigal:2.6	16453-16905	453	Disulfide bond formation protein DsbA [Salmonella enterica]		pSLT_00023	Prodigal:2.6	17068-17229	162	Disulfide bond formation protein DsbA [Salmonella enterica]
p06D1274_00024	prokka	17075-17236	162	No Prokka Description		p08D015_00025	prokka	17049-17210	162	No Prokka Description		p08OTH027_00024	prokka	17071-17232	162	No Prokka Description		p11OTH031_00025	prokka	17064-17225	162	No Prokka Description		p12OTH012_00022	prokka	17042-17203	162	No Prokka Description		p14OTH007_00023	prokka	17071-17232	162	No Prokka Description		pSEN_00022	prokka	16453-16905	453	No Prokka Description		pSLT_00023	prokka	17068-17229	162	No Prokka Description
p06D1274_00025	Prodigal:2.6	17243-17527	285	Disulfide bond formation protein DsbA [Salmonella enterica]		p08D015_00026	Prodigal:2.6	17217-17501	285	Disulfide bond formation protein DsbA [Salmonella enterica]		p08OTH027_00025	Prodigal:2.6	17239-17523	285	Disulfide bond formation protein DsbA [Salmonella enterica]		p11OTH031_00026	Prodigal:2.6	17232-17516	285	Disulfide bond formation protein DsbA [Salmonella enterica]		p12OTH012_00023	Prodigal:2.6	17210-17494	285	Disulfide bond formation protein DsbA [Salmonella enterica]		p14OTH007_00024	Prodigal:2.6	17239-17523	285	Disulfide bond formation protein DsbA [Salmonella enterica]								pSLT_00024	Prodigal:2.6	17236-17520	285	Disulfide bond formation protein DsbA [Salmonella enterica]
p06D1274_00025	prokka	17243-17527	285	No Prokka Description		p08D015_00026	prokka	17217-17501	285	No Prokka Description		p08OTH027_00025	prokka	17239-17523	285	No Prokka Description		p11OTH031_00026	prokka	17232-17516	285	No Prokka Description		p12OTH012_00023	prokka	17210-17494	285	No Prokka Description		p14OTH007_00024	prokka	17239-17523	285	No Prokka Description								pSLT_00024	prokka	17236-17520	285	No Prokka Description
p06D1274_00026	Prodigal:2.6	17642-18226	585	Fertility inhibition protein		p08D015_00027	Prodigal:2.6	17616-18200	585	Fertility inhibition protein		p08OTH027_00026	Prodigal:2.6	17638-18222	585	Fertility inhibition protein		p11OTH031_00027	Prodigal:2.6	17631-18215	585	Fertility inhibition protein		p12OTH012_00024	Prodigal:2.6	17609-18193	585	Fertility inhibition protein		p14OTH007_00025	Prodigal:2.6	17638-18222	585	Fertility inhibition protein		pSEN_00023	Prodigal:2.6	17022-17444	423	Fertility inhibition protein		pSLT_00025	Prodigal:2.6	17635-18219	585	Fertility inhibition protein
	prokka	17642-18226	585	finO		p08D015_00027	prokka	17616-18200	585	finO		p08OTH027_00026	prokka	17638-18222	585	finO		p11OTH031_00027	prokka	17631-18215	585	finO		p12OTH012_00024	prokka	17609-18193	585	finO		p14OTH007_00025	prokka	17638-18222	585	finO		pSEN_00023	prokka	17022-17444	423	finO		pSLT_00025	prokka	17635-18219	585	finO
p06D1274_00027	Prodigal:2.6	18260-19000	741	Type-f conjugative transfer system pilin acetylase TraX [Salmonella enterica]		p08D015_00028	Prodigal:2.6	18234-18974	741	Type-f conjugative transfer system pilin acetylase TraX [Salmonella enterica]		p08OTH027_00027	Prodigal:2.6	18256-18996	741	Type-f conjugative transfer system pilin acetylase TraX [Salmonella enterica]		p11OTH031_00028	Prodigal:2.6	18249-18989	741	Type-f conjugative transfer system pilin acetylase TraX [Salmonella enterica]		p12OTH012_00025	Prodigal:2.6	18227-18967	741	Type-f conjugative transfer system pilin acetylase TraX [Salmonella enterica]		p14OTH007_00026	Prodigal:2.6	18256-18996	741	Type-f conjugative transfer system pilin acetylase TraX [Salmonella enterica]								pSLT_00026	Prodigal:2.6	18253-18993	741	Type-f conjugative transfer system pilin acetylase TraX [Salmonella enterica]
p06D1274_00027	prokka	18260-19000	741	No Prokka Description		p08D015_00028	prokka	18234-18974	741	No Prokka Description		p08OTH027_00027	prokka	18256-18996	741	No Prokka Description		p11OTH031_00028	prokka	18249-18989	741	No Prokka Description		p12OTH012_00025	prokka	18227-18967	741	No Prokka Description		p14OTH007_00026	prokka	18256-18996	741	No Prokka Description								pSLT_00026	prokka	18253-18993	741	No Prokka Description
p06D1274_00028	Prodigal:2.6	19020-20222	1203	Multifunctional conjugation protein TraI		p08D015_00029	Prodigal:2.6	18994-24252	5259	Multifunctional conjugation protein TraI		p08OTH027_00028	Prodigal:2.6	19016-24274	5259	Multifunctional conjugation protein TraI		p11OTH031_00029	Prodigal:2.6	19009-24267	5259	Multifunctional conjugation protein TraI		p12OTH012_00026	Prodigal:2.6	18987-24245	5259	Multifunctional conjugation protein TraI		p14OTH007_00027	Prodigal:2.6	19016-24274	5259	Multifunctional conjugation protein TraI								pSLT_00027	Prodigal:2.6	19013-24271	5259	Multifunctional conjugation protein TraI
p06D1274_00028	prokka	19020-20222	1203	traI_1		p08D015_00029	prokka	18994-24252	5259	traI		p08OTH027_00028	prokka	19016-24274	5259	traI		p11OTH031_00029	prokka	19009-24267	5259	traI		p12OTH012_00026	prokka	18987-24245	5259	traI		p14OTH007_00027	prokka	19016-24274	5259	traI								pSLT_00027	prokka	19013-24271	5259	traI
p06D1274_00029	Prodigal:2.6	20198-24277	4080	Multifunctional conjugation protein TraI
p06D1274_00029	prokka	20198-24277	4080	traI_2
p06D1274_00030	Prodigal:2.6	24359-24586	228	Antitoxin VapB		p08D015_00030	Prodigal:2.6	24334-24561	228	Antitoxin VapB		p08OTH027_00029	Prodigal:2.6	24356-24583	228	Antitoxin VapB		p11OTH031_00030	Prodigal:2.6	24349-24576	228	Antitoxin VapB		p12OTH012_00027	Prodigal:2.6	24327-24554	228	Antitoxin VapB		p14OTH007_00028	Prodigal:2.6	24356-24583	228	Antitoxin VapB								pSLT_00028	Prodigal:2.6	24353-24580	228	Antitoxin VapB
p06D1274_00030	prokka	24359-24586	228	vapB		p08D015_00030	prokka	24334-24561	228	vapB		p08OTH027_00029	prokka	24356-24583	228	vapB		p11OTH031_00030	prokka	24349-24576	228	vapB		p12OTH012_00027	prokka	24327-24554	228	vapB		p14OTH007_00028	prokka	24356-24583	228	vapB								pSLT_00028	prokka	24353-24580	228	vapB
p06D1274_00031	Prodigal:2.6	24586-24984	399	tRNA(fMet)-specific endonuclease VapC		p08D015_00031	Prodigal:2.6	24561-24959	399	tRNA(fMet)-specific endonuclease VapC		p08OTH027_00030	Prodigal:2.6	24583-24981	399	tRNA(fMet)-specific endonuclease VapC		p11OTH031_00031	Prodigal:2.6	24576-24974	399	tRNA(fMet)-specific endonuclease VapC		p12OTH012_00028	Prodigal:2.6	24554-24952	399	tRNA(fMet)-specific endonuclease VapC		p14OTH007_00029	Prodigal:2.6	24583-24981	399	tRNA(fMet)-specific endonuclease VapC								pSLT_00029	Prodigal:2.6	24580-24978	399	tRNA(fMet)-specific endonuclease VapC
p06D1274_00031	prokka	24586-24984	399	vapC		p08D015_00031	prokka	24561-24959	399	vapC		p08OTH027_00030	prokka	24583-24981	399	vapC		p11OTH031_00031	prokka	24576-24974	399	vapC		p12OTH012_00028	prokka	24554-24952	399	vapC		p14OTH007_00029	prokka	24583-24981	399	vapC								pSLT_00029	prokka	24580-24978	399	vapC
p06D1274_00032	Prodigal:2.6	24993-27209	2217	Coupling protein TraD		p08D015_00032	Prodigal:2.6	24968-27175	2208	Coupling protein TraD		p08OTH027_00031	Prodigal:2.6	24990-25190	201	Coupling protein TraD		p11OTH031_00032	Prodigal:2.6	24983-27154	2172	Coupling protein TraD		p12OTH012_00029	Prodigal:2.6	24961-27240	2280	Coupling protein TraD		p14OTH007_00030	Prodigal:2.6	24990-27350	2361	Coupling protein TraD								pSLT_00030	Prodigal:2.6	24987-27230	2244	Coupling protein TraD
p06D1274_00032	prokka	24993-27209	2217	traD		p08D015_00032	prokka	24968-27175	2208	traD		p08OTH027_00031	prokka	24990-25190	201	traD_1		p11OTH031_00032	prokka	24983-27154	2172	traD		p12OTH012_00029	prokka	24961-27240	2280	traD		p14OTH007_00030	prokka	24990-27350	2361	traD								pSLT_00030	prokka	24987-27230	2244	traD
												p08OTH027_00032	Prodigal:2.6	25226-27268	2043	Coupling protein TraD
												p08OTH027_00032	prokka	25226-27268	2043	traD_2
p06D1274_00033	Prodigal:2.6	27586-28317	732	Lipoprotein YlpA		p08D015_00033	Prodigal:2.6	27552-28283	732	Lipoprotein YlpA		p08OTH027_00033	Prodigal:2.6	27645-28376	732	Lipoprotein YlpA		p11OTH031_00033	Prodigal:2.6	27531-28262	732	Lipoprotein YlpA		p12OTH012_00030	Prodigal:2.6	27617-28348	732	Lipoprotein YlpA		p14OTH007_00031	Prodigal:2.6	27727-28458	732	Lipoprotein YlpA								pSLT_00031	Prodigal:2.6	27607-28332	726	Lipoprotein YlpA
p06D1274_00033	prokka	27586-28317	732	ylpA		p08D015_00033	prokka	27552-28283	732	ylpA		p08OTH027_00033	prokka	27645-28376	732	ylpA		p11OTH031_00033	prokka	27531-28262	732	ylpA		p12OTH012_00030	prokka	27617-28348	732	ylpA		p14OTH007_00031	prokka	27727-28458	732	ylpA								pSLT_00031	prokka	27607-28332	726	ylpA
p06D1274_00033	SignalP:4.1	28258-28317	60	putative signal peptide		p08D015_00033	SignalP:4.1	28224-28283	60	putative signal peptide		p08OTH027_00033	SignalP:4.1	28317-28376	60	putative signal peptide		p11OTH031_00033	SignalP:4.1	28203-28262	60	putative signal peptide		p12OTH012_00030	SignalP:4.1	28289-28348	60	putative signal peptide		p14OTH007_00031	SignalP:4.1	28399-28458	60	putative signal peptide								pSLT_00031	SignalP:4.1	28249-28332	84	putative signal peptide
p06D1274_00034	Prodigal:2.6	28334-28861	528	Protein TraS		p08D015_00034	Prodigal:2.6	28300-28827	528	Protein TraS		p08OTH027_00034	Prodigal:2.6	28393-28920	528	Protein TraS		p11OTH031_00034	Prodigal:2.6	28279-28806	528	Protein TraS		p12OTH012_00031	Prodigal:2.6	28365-28892	528	Protein TraS		p14OTH007_00032	Prodigal:2.6	28475-29002	528	Protein TraS								pSLT_00032	Prodigal:2.6	28374-28862	489	Entry exclusion protein [Escherichia coli]
p06D1274_00034	prokka	28334-28861	528	traS		p08D015_00034	prokka	28300-28827	528	traS		p08OTH027_00034	prokka	28393-28920	528	traS		p11OTH031_00034	prokka	28279-28806	528	traS		p12OTH012_00031	prokka	28365-28892	528	traS		p14OTH007_00032	prokka	28475-29002	528	traS								pSLT_00032	prokka	28374-28862	489	No Prokka Description
p06D1274_00035	Prodigal:2.6	28858-30795	1938	Conjugal transfer protein TraG [Salmonella enterica]		p08D015_00035	Prodigal:2.6	28824-30761	1938	Conjugal transfer protein TraG [Salmonella enterica]		p08OTH027_00035	Prodigal:2.6	28917-30854	1938	Conjugal transfer protein TraG [Salmonella enterica]		p11OTH031_00035	Prodigal:2.6	28803-30740	1938	Conjugal transfer protein TraG [Salmonella enterica]		p12OTH012_00032	Prodigal:2.6	28889-30826	1938	Conjugal transfer protein TraG [Salmonella enterica]		p14OTH007_00033	Prodigal:2.6	28999-30936	1938	Conjugal transfer protein TraG [Salmonella enterica]								pSLT_00033	Prodigal:2.6	28884-31706	2823	Conjugal transfer protein TraG [Salmonella enterica]
p06D1274_00035	prokka	28858-30795	1938	No Prokka Description		p08D015_00035	prokka	28824-30761	1938	No Prokka Description		p08OTH027_00035	prokka	28917-30854	1938	No Prokka Description		p11OTH031_00035	prokka	28803-30740	1938	No Prokka Description		p12OTH012_00032	prokka	28889-30826	1938	No Prokka Description		p14OTH007_00033	prokka	28999-30936	1938	No Prokka Description								pSLT_00033	prokka	28884-31706	2823	No Prokka Description
p06D1274_00036	Prodigal:2.6	30878-31717	840	Conjugal transfer protein TraG [Salmonella enterica]		p08D015_00036	Prodigal:2.6	30844-31683	840	Conjugal transfer protein TraG [Salmonella enterica]		p08OTH027_00036	Prodigal:2.6	30937-31776	840	Conjugal transfer protein TraG [Salmonella enterica]		p11OTH031_00036	Prodigal:2.6	30823-31662	840	Conjugal transfer protein TraG [Salmonella enterica]		p12OTH012_00033	Prodigal:2.6	30909-31748	840	Conjugal transfer protein TraG [Salmonella enterica]		p14OTH007_00034	Prodigal:2.6	31019-31858	840	Conjugal transfer protein TraG [Salmonella enterica]
p06D1274_00036	prokka	30878-31717	840	No Prokka Description		p08D015_00036	prokka	30844-31683	840	No Prokka Description		p08OTH027_00036	prokka	30937-31776	840	No Prokka Description		p11OTH031_00036	prokka	30823-31662	840	No Prokka Description		p12OTH012_00033	prokka	30909-31748	840	No Prokka Description		p14OTH007_00034	prokka	31019-31858	840	No Prokka Description
p06D1274_00037	Prodigal:2.6	31714-33096	1383	Conjugal transfer protein TraH [Escherichia coli]		p08D015_00037	Prodigal:2.6	31680-33062	1383	Conjugal transfer protein TraH [Escherichia coli]		p08OTH027_00037	Prodigal:2.6	31773-33155	1383	Conjugal transfer protein TraH [Escherichia coli]		p11OTH031_00037	Prodigal:2.6	31659-33041	1383	Conjugal transfer protein TraH [Escherichia coli]		p12OTH012_00034	Prodigal:2.6	31745-33127	1383	Conjugal transfer protein TraH [Escherichia coli]		p14OTH007_00035	Prodigal:2.6	31855-33237	1383	Conjugal transfer protein TraH [Escherichia coli]								pSLT_00034	Prodigal:2.6	31703-33085	1383	Conjugal transfer pilus assembly protein TraH [Salmonella enterica]
p06D1274_00037	prokka	31714-33096	1383	No Prokka Description		p08D015_00037	prokka	31680-33062	1383	No Prokka Description		p08OTH027_00037	prokka	31773-33155	1383	No Prokka Description		p11OTH031_00037	prokka	31659-33041	1383	No Prokka Description		p12OTH012_00034	prokka	31745-33127	1383	No Prokka Description		p14OTH007_00035	prokka	31855-33237	1383	No Prokka Description								pSLT_00034	prokka	31703-33085	1383	No Prokka Description
p06D1274_00037	SignalP:4.1	33016-33096	81	putative signal peptide		p08D015_00037	SignalP:4.1	32982-33062	81	putative signal peptide		p08OTH027_00037	SignalP:4.1	33075-33155	81	putative signal peptide		p11OTH031_00037	SignalP:4.1	32961-33041	81	putative signal peptide		p12OTH012_00034	SignalP:4.1	33047-33127	81	putative signal peptide		p14OTH007_00035	SignalP:4.1	33157-33237	81	putative signal peptide								pSLT_00034	SignalP:4.1	33005-33085	81	putative signal peptide
p06D1274_00038	Prodigal:2.6	33086-33634	549	Type-f conjugative transfer system pilin assembly thiol-disulfide isomerase TrbB [Escherichia coli]		p08D015_00038	Prodigal:2.6	33052-33600	549	Type-f conjugative transfer system pilin assembly thiol-disulfide isomerase TrbB [Escherichia coli]		p08OTH027_00038	Prodigal:2.6	33145-33693	549	Type-f conjugative transfer system pilin assembly thiol-disulfide isomerase TrbB [Escherichia coli]		p11OTH031_00038	Prodigal:2.6	33031-33579	549	Type-f conjugative transfer system pilin assembly thiol-disulfide isomerase TrbB [Escherichia coli]		p12OTH012_00035	Prodigal:2.6	33117-33665	549	Type-f conjugative transfer system pilin assembly thiol-disulfide isomerase TrbB [Escherichia coli]		p14OTH007_00036	Prodigal:2.6	33227-33775	549	Type-f conjugative transfer system pilin assembly thiol-disulfide isomerase TrbB [Escherichia coli]								pSLT_00035	Prodigal:2.6	33075-33623	549	Type-f conjugative transfer system pilin assembly thiol-disulfide isomerase TrbB [Salmonella enterica]
p06D1274_00038	prokka	33086-33634	549	No Prokka Description		p08D015_00038	prokka	33052-33600	549	No Prokka Description		p08OTH027_00038	prokka	33145-33693	549	No Prokka Description		p11OTH031_00038	prokka	33031-33579	549	No Prokka Description		p12OTH012_00035	prokka	33117-33665	549	No Prokka Description		p14OTH007_00036	prokka	33227-33775	549	No Prokka Description								pSLT_00035	prokka	33075-33623	549	No Prokka Description
p06D1274_00038	SignalP:4.1	33572-33634	63	putative signal peptide		p08D015_00038	SignalP:4.1	33538-33600	63	putative signal peptide		p08OTH027_00038	SignalP:4.1	33631-33693	63	putative signal peptide		p11OTH031_00038	SignalP:4.1	33517-33579	63	putative signal peptide		p12OTH012_00035	SignalP:4.1	33603-33665	63	putative signal peptide		p14OTH007_00036	SignalP:4.1	33713-33775	63	putative signal peptide								pSLT_00035	SignalP:4.1	33561-33623	63	putative signal peptide
p06D1274_00039	Prodigal:2.6	33621-33914	294	Protein TraQ		p08D015_00039	Prodigal:2.6	33587-33880	294	Protein TraQ		p08OTH027_00039	Prodigal:2.6	33680-33973	294	Protein TraQ		p11OTH031_00039	Prodigal:2.6	33566-33859	294	Protein TraQ		p12OTH012_00036	Prodigal:2.6	33652-33945	294	Protein TraQ		p14OTH007_00037	Prodigal:2.6	33762-34055	294	Protein TraQ								pSLT_00036	Prodigal:2.6	33610-33903	294	Protein TraQ
p06D1274_00039	prokka	33621-33914	294	traQ		p08D015_00039	prokka	33587-33880	294	traQ		p08OTH027_00039	prokka	33680-33973	294	traQ		p11OTH031_00039	prokka	33566-33859	294	traQ		p12OTH012_00036	prokka	33652-33945	294	traQ		p14OTH007_00037	prokka	33762-34055	294	traQ								pSLT_00036	prokka	33610-33903	294	traQ
p06D1274_00040	Prodigal:2.6	34128-34871	744	Type-f conjugative transfer system pilin assembly protein TraF [Salmonella enterica]		p08D015_00040	Prodigal:2.6	34094-34837	744	Type-f conjugative transfer system pilin assembly protein TraF [Salmonella enterica]		p08OTH027_00040	Prodigal:2.6	34187-34930	744	Type-f conjugative transfer system pilin assembly protein TraF [Salmonella enterica]		p11OTH031_00040	Prodigal:2.6	34073-34816	744	Type-f conjugative transfer system pilin assembly protein TraF [Salmonella enterica]		p12OTH012_00037	Prodigal:2.6	34159-34902	744	Type-f conjugative transfer system pilin assembly protein TraF [Salmonella enterica]		p14OTH007_00038	Prodigal:2.6	34269-35012	744	Type-f conjugative transfer system pilin assembly protein TraF [Salmonella enterica]								pSLT_00037	Prodigal:2.6	34117-34866	750	Type-f conjugative transfer system pilin assembly protein TraF [Salmonella enterica]
p06D1274_00040	prokka	34128-34871	744	No Prokka Description		p08D015_00040	prokka	34094-34837	744	No Prokka Description		p08OTH027_00040	prokka	34187-34930	744	No Prokka Description		p11OTH031_00040	prokka	34073-34816	744	No Prokka Description		p12OTH012_00037	prokka	34159-34902	744	No Prokka Description		p14OTH007_00038	prokka	34269-35012	744	No Prokka Description								pSLT_00037	prokka	34117-34866	750	No Prokka Description
p06D1274_00040	SignalP:4.1	34812-34871	60	putative signal peptide		p08D015_00040	SignalP:4.1	34778-34837	60	putative signal peptide		p08OTH027_00040	SignalP:4.1	34871-34930	60	putative signal peptide		p11OTH031_00040	SignalP:4.1	34757-34816	60	putative signal peptide		p12OTH012_00037	SignalP:4.1	34843-34902	60	putative signal peptide		p14OTH007_00038	SignalP:4.1	34953-35012	60	putative signal peptide								pSLT_00037	SignalP:4.1	34801-34866	66	putative signal peptide
p06D1274_00041	Prodigal:2.6	34884-35099	216	Conjugal transfer protein TrbE [Escherichia coli]		p08D015_00041	Prodigal:2.6	34850-35065	216	Conjugal transfer protein TrbE [Escherichia coli]		p08OTH027_00041	Prodigal:2.6	34943-35158	216	Conjugal transfer protein TrbE [Escherichia coli]		p11OTH031_00041	Prodigal:2.6	34829-35044	216	Conjugal transfer protein TrbE [Escherichia coli]		p12OTH012_00038	Prodigal:2.6	34915-35130	216	Conjugal transfer protein TrbE [Escherichia coli]		p14OTH007_00039	Prodigal:2.6	35025-35240	216	Conjugal transfer protein TrbE [Escherichia coli]								pSLT_00038	Prodigal:2.6	34878-35093	216	Conjugal transfer protein [Salmonella enterica]
p06D1274_00041	prokka	34884-35099	216	No Prokka Description		p08D015_00041	prokka	34850-35065	216	No Prokka Description		p08OTH027_00041	prokka	34943-35158	216	No Prokka Description		p11OTH031_00041	prokka	34829-35044	216	No Prokka Description		p12OTH012_00038	prokka	34915-35130	216	No Prokka Description		p14OTH007_00039	prokka	35025-35240	216	No Prokka Description								pSLT_00038	prokka	34878-35093	216	No Prokka Description
p06D1274_00042	Prodigal:2.6	35110-35586	477	Cytosine permease [Burkholderia thailandensis]		p08D015_00042	Prodigal:2.6	35076-35552	477	Cytosine permease [Burkholderia thailandensis]		p08OTH027_00042	Prodigal:2.6	35169-35468	300	Cytosine permease [Burkholderia thailandensis]		p11OTH031_00042	Prodigal:2.6	35055-35531	477	Cytosine permease [Burkholderia thailandensis]		p12OTH012_00039	Prodigal:2.6	35141-35617	477	Cytosine permease [Burkholderia thailandensis]		p14OTH007_00040	Prodigal:2.6	35251-35727	477	Cytosine permease [Burkholderia thailandensis]
p06D1274_00042	prokka	35110-35586	477	No Prokka Description		p08D015_00042	prokka	35076-35552	477	No Prokka Description		p08OTH027_00042	prokka	35169-35468	300	No Prokka Description		p11OTH031_00042	prokka	35055-35531	477	No Prokka Description		p12OTH012_00039	prokka	35141-35617	477	No Prokka Description		p14OTH007_00040	prokka	35251-35727	477	No Prokka Description
												p08OTH027_00043	Prodigal:2.6	35522-35644	123	Cytosine permease [Burkholderia thailandensis]
												p08OTH027_00043	prokka	35522-35644	123	No Prokka Description
p06D1274_00043	Prodigal:2.6	35597-37423	1827	Type-f conjugative transfer system mating-pair stabilization protein TraN [Salmonella enterica]		p08D015_00043	Prodigal:2.6	35563-37389	1827	Type-f conjugative transfer system mating-pair stabilization protein TraN [Salmonella enterica]		p08OTH027_00044	Prodigal:2.6	35655-37481	1827	Type-f conjugative transfer system mating-pair stabilization protein TraN [Salmonella enterica]		p11OTH031_00043	Prodigal:2.6	35542-37368	1827	Type-f conjugative transfer system mating-pair stabilization protein TraN [Salmonella enterica]		p12OTH012_00040	Prodigal:2.6	35628-37454	1827	Type-f conjugative transfer system mating-pair stabilization protein TraN [Salmonella enterica]		p14OTH007_00041	Prodigal:2.6	35738-37564	1827	Type-f conjugative transfer system mating-pair stabilization protein TraN [Salmonella enterica]								pSLT_00039	Prodigal:2.6	35104-36930	1827	Type-f conjugative transfer system mating-pair stabilization protein TraN [Salmonella enterica]
p06D1274_00043	prokka	35597-37423	1827	No Prokka Description		p08D015_00043	prokka	35563-37389	1827	No Prokka Description		p08OTH027_00044	prokka	35655-37481	1827	No Prokka Description		p11OTH031_00043	prokka	35542-37368	1827	No Prokka Description		p12OTH012_00040	prokka	35628-37454	1827	No Prokka Description		p14OTH007_00041	prokka	35738-37564	1827	No Prokka Description								pSLT_00039	prokka	35104-36930	1827	No Prokka Description
p06D1274_00043	SignalP:4.1	37367-37423	57	putative signal peptide		p08D015_00043	SignalP:4.1	37333-37389	57	putative signal peptide		p08OTH027_00044	SignalP:4.1	37425-37481	57	putative signal peptide		p11OTH031_00043	SignalP:4.1	37312-37368	57	putative signal peptide		p12OTH012_00040	SignalP:4.1	37398-37454	57	putative signal peptide		p14OTH007_00041	SignalP:4.1	37508-37564	57	putative signal peptide								pSLT_00039	SignalP:4.1	36874-36930	57	putative signal peptide
p06D1274_00044	Prodigal:2.6	37420-37839	420	Hnh endonuclease [Escherichia coli]		p08D015_00044	Prodigal:2.6	37386-37805	420	Hnh endonuclease [Escherichia coli]		p08OTH027_00045	Prodigal:2.6	37478-37897	420	Hnh endonuclease [Escherichia coli]		p11OTH031_00044	Prodigal:2.6	37365-37784	420	Hnh endonuclease [Escherichia coli]		p12OTH012_00041	Prodigal:2.6	37451-37870	420	Hnh endonuclease [Escherichia coli]		p14OTH007_00042	Prodigal:2.6	37561-37980	420	Hnh endonuclease [Escherichia coli]								pSLT_00040	Prodigal:2.6	36927-37346	420	Hnh endonuclease [Escherichia coli]
p06D1274_00044	prokka	37420-37839	420	No Prokka Description		p08D015_00044	prokka	37386-37805	420	No Prokka Description		p08OTH027_00045	prokka	37478-37897	420	No Prokka Description		p11OTH031_00044	prokka	37365-37784	420	No Prokka Description		p12OTH012_00041	prokka	37451-37870	420	No Prokka Description		p14OTH007_00042	prokka	37561-37980	420	No Prokka Description								pSLT_00040	prokka	36927-37346	420	No Prokka Description
p06D1274_00045	Prodigal:2.6	37876-38514	639	Type-f conjugative transfer system pilin assembly protein TrbC [Escherichia coli]		p08D015_00045	Prodigal:2.6	37842-38480	639	Type-f conjugative transfer system pilin assembly protein TrbC [Escherichia coli]		p08OTH027_00046	Prodigal:2.6	37934-38572	639	Type-f conjugative transfer system pilin assembly protein TrbC [Escherichia coli]		p11OTH031_00045	Prodigal:2.6	37821-38459	639	Type-f conjugative transfer system pilin assembly protein TrbC [Escherichia coli]		p12OTH012_00042	Prodigal:2.6	37907-38545	639	Type-f conjugative transfer system pilin assembly protein TrbC [Escherichia coli]		p14OTH007_00043	Prodigal:2.6	38017-38655	639	Type-f conjugative transfer system pilin assembly protein TrbC [Escherichia coli]								pSLT_00041	Prodigal:2.6	37383-38021	639	Type-f conjugative transfer system pilin assembly protein TrbC [Salmonella enterica]
p06D1274_00045	prokka	37876-38514	639	No Prokka Description		p08D015_00045	prokka	37842-38480	639	No Prokka Description		p08OTH027_00046	prokka	37934-38572	639	No Prokka Description		p11OTH031_00045	prokka	37821-38459	639	No Prokka Description		p12OTH012_00042	prokka	37907-38545	639	No Prokka Description		p14OTH007_00043	prokka	38017-38655	639	No Prokka Description								pSLT_00041	prokka	37383-38021	639	No Prokka Description
p06D1274_00045	SignalP:4.1	38449-38514	66	putative signal peptide		p08D015_00045	SignalP:4.1	38415-38480	66	putative signal peptide		p08OTH027_00046	SignalP:4.1	38507-38572	66	putative signal peptide		p11OTH031_00045	SignalP:4.1	38394-38459	66	putative signal peptide		p12OTH012_00042	SignalP:4.1	38480-38545	66	putative signal peptide		p14OTH007_00043	SignalP:4.1	38590-38655	66	putative signal peptide								pSLT_00041	SignalP:4.1	37956-38021	66	putative signal peptide
p06D1274_00046	Prodigal:2.6	38499-38801	303	putative protein [Salmonella enterica subsp. enterica serovar Bovismorbificans]		p08D015_00046	Prodigal:2.6	38465-38767	303	putative protein [Salmonella enterica subsp. enterica serovar Bovismorbificans]		p08OTH027_00047	Prodigal:2.6	38557-38859	303	putative protein [Salmonella enterica subsp. enterica serovar Bovismorbificans]		p11OTH031_00046	Prodigal:2.6	38444-38746	303	putative protein [Salmonella enterica subsp. enterica serovar Bovismorbificans]		p12OTH012_00043	Prodigal:2.6	38530-38832	303	putative protein [Salmonella enterica subsp. enterica serovar Bovismorbificans]		p14OTH007_00044	Prodigal:2.6	38640-38942	303	putative protein [Salmonella enterica subsp. enterica serovar Bovismorbificans]								pSLT_00042	Prodigal:2.6	38006-38308	303	putative protein [Salmonella enterica subsp. enterica serovar Bovismorbificans]
p06D1274_00046	prokka	38499-38801	303	No Prokka Description		p08D015_00046	prokka	38465-38767	303	No Prokka Description		p08OTH027_00047	prokka	38557-38859	303	No Prokka Description		p11OTH031_00046	prokka	38444-38746	303	No Prokka Description		p12OTH012_00043	prokka	38530-38832	303	No Prokka Description		p14OTH007_00044	prokka	38640-38942	303	No Prokka Description								pSLT_00042	prokka	38006-38308	303	No Prokka Description
p06D1274_00047	Prodigal:2.6	38826-39818	993	Conjugal transfer protein TraU [Salmonella enterica]		p08D015_00047	Prodigal:2.6	38792-39784	993	Conjugal transfer protein TraU [Salmonella enterica]		p08OTH027_00048	Prodigal:2.6	38884-39876	993	Conjugal transfer protein TraU [Salmonella enterica]		p11OTH031_00047	Prodigal:2.6	38771-39763	993	Conjugal transfer protein TraU [Salmonella enterica]		p12OTH012_00044	Prodigal:2.6	38857-39849	993	Conjugal transfer protein TraU [Salmonella enterica]		p14OTH007_00045	Prodigal:2.6	38967-39959	993	Conjugal transfer protein TraU [Salmonella enterica]								pSLT_00043	Prodigal:2.6	38333-39325	993	Conjugal transfer pilus assembly protein TraU [Salmonella enterica]
p06D1274_00047	prokka	38826-39818	993	No Prokka Description		p08D015_00047	prokka	38792-39784	993	No Prokka Description		p08OTH027_00048	prokka	38884-39876	993	No Prokka Description		p11OTH031_00047	prokka	38771-39763	993	No Prokka Description		p12OTH012_00044	prokka	38857-39849	993	No Prokka Description		p14OTH007_00045	prokka	38967-39959	993	No Prokka Description								pSLT_00043	prokka	38333-39325	993	No Prokka Description
p06D1274_00047	SignalP:4.1	39750-39818	69	putative signal peptide		p08D015_00047	SignalP:4.1	39716-39784	69	putative signal peptide		p08OTH027_00048	SignalP:4.1	39808-39876	69	putative signal peptide		p11OTH031_00047	SignalP:4.1	39695-39763	69	putative signal peptide		p12OTH012_00044	SignalP:4.1	39781-39849	69	putative signal peptide		p14OTH007_00045	SignalP:4.1	39891-39959	69	putative signal peptide								pSLT_00043	SignalP:4.1	39257-39325	69	putative signal peptide
p06D1274_00048	Prodigal:2.6	39815-40447	633	Type-f conjugative transfer system protein TraW [Escherichia coli]		p08D015_00048	Prodigal:2.6	39781-40413	633	Type-f conjugative transfer system protein TraW [Escherichia coli]		p08OTH027_00049	Prodigal:2.6	39873-40505	633	Type-f conjugative transfer system protein TraW [Escherichia coli]		p11OTH031_00048	Prodigal:2.6	39760-40392	633	Type-f conjugative transfer system protein TraW [Escherichia coli]		p12OTH012_00045	Prodigal:2.6	39846-40478	633	Type-f conjugative transfer system protein TraW [Escherichia coli]		p14OTH007_00046	Prodigal:2.6	39956-40588	633	Type-f conjugative transfer system protein TraW [Escherichia coli]								pSLT_00044	Prodigal:2.6	39322-39954	633	Type-f conjugative transfer system protein TraW [Salmonella enterica]
p06D1274_00048	prokka	39815-40447	633	No Prokka Description		p08D015_00048	prokka	39781-40413	633	No Prokka Description		p08OTH027_00049	prokka	39873-40505	633	No Prokka Description		p11OTH031_00048	prokka	39760-40392	633	No Prokka Description		p12OTH012_00045	prokka	39846-40478	633	No Prokka Description		p14OTH007_00046	prokka	39956-40588	633	No Prokka Description								pSLT_00044	prokka	39322-39954	633	No Prokka Description
p06D1274_00049	Prodigal:2.6	40444-40830	387	Type-f conjugative transfer system protein TrbI [Escherichia coli]		p08D015_00049	Prodigal:2.6	40410-40796	387	Type-f conjugative transfer system protein TrbI [Escherichia coli]		p08OTH027_00050	Prodigal:2.6	40502-40888	387	Type-f conjugative transfer system protein TrbI [Escherichia coli]		p11OTH031_00049	Prodigal:2.6	40389-40775	387	Type-f conjugative transfer system protein TrbI [Escherichia coli]		p12OTH012_00046	Prodigal:2.6	40475-40861	387	Type-f conjugative transfer system protein TrbI [Escherichia coli]		p14OTH007_00047	Prodigal:2.6	40585-40971	387	Type-f conjugative transfer system protein TrbI [Escherichia coli]								pSLT_00045	Prodigal:2.6	39951-40337	387	Type-f conjugative transfer system protein TrbI [Escherichia coli]
p06D1274_00049	prokka	40444-40830	387	No Prokka Description		p08D015_00049	prokka	40410-40796	387	No Prokka Description		p08OTH027_00050	prokka	40502-40888	387	No Prokka Description		p11OTH031_00049	prokka	40389-40775	387	No Prokka Description		p12OTH012_00046	prokka	40475-40861	387	No Prokka Description		p14OTH007_00047	prokka	40585-40971	387	No Prokka Description								pSLT_00045	prokka	39951-40337	387	No Prokka Description
p06D1274_00050	Prodigal:2.6	40805-43453	2649	Protein TraC		p08D015_00050	Prodigal:2.6	40771-43419	2649	Protein TraC		p08OTH027_00051	Prodigal:2.6	40863-43511	2649	Protein TraC		p11OTH031_00050	Prodigal:2.6	40750-43398	2649	Protein TraC		p12OTH012_00047	Prodigal:2.6	40836-43484	2649	Protein TraC		p14OTH007_00048	Prodigal:2.6	40946-43594	2649	Protein TraC								pSLT_00046	Prodigal:2.6	40312-42960	2649	Protein TraC
p06D1274_00050	prokka	40805-43453	2649	traC		p08D015_00050	prokka	40771-43419	2649	traC		p08OTH027_00051	prokka	40863-43511	2649	traC		p11OTH031_00050	prokka	40750-43398	2649	traC		p12OTH012_00047	prokka	40836-43484	2649	traC		p14OTH007_00048	prokka	40946-43594	2649	traC								pSLT_00046	prokka	40312-42960	2649	traC
p06D1274_00051	Prodigal:2.6	43469-43852	384	Multidrug transporter [Salmonella enterica subsp. enterica serovar Bareilly str.]		p08D015_00051	Prodigal:2.6	43435-43818	384	Multidrug transporter [Salmonella enterica subsp. enterica serovar Bareilly str.]		p08OTH027_00052	Prodigal:2.6	43527-43910	384	Multidrug transporter [Salmonella enterica subsp. enterica serovar Bareilly str.]		p11OTH031_00051	Prodigal:2.6	43414-43797	384	Multidrug transporter [Salmonella enterica subsp. enterica serovar Bareilly str.]		p12OTH012_00048	Prodigal:2.6	43500-43883	384	Multidrug transporter [Salmonella enterica subsp. enterica serovar Bareilly str.]		p14OTH007_00049	Prodigal:2.6	43610-43993	384	Multidrug transporter [Salmonella enterica subsp. enterica serovar Bareilly str.]								pSLT_00047	Prodigal:2.6	42976-43239	264	Multidrug transporter [Salmonella enterica]
p06D1274_00051	prokka	43469-43852	384	No Prokka Description		p08D015_00051	prokka	43435-43818	384	No Prokka Description		p08OTH027_00052	prokka	43527-43910	384	No Prokka Description		p11OTH031_00051	prokka	43414-43797	384	No Prokka Description		p12OTH012_00048	prokka	43500-43883	384	No Prokka Description		p14OTH007_00049	prokka	43610-43993	384	No Prokka Description								pSLT_00047	prokka	42976-43239	264	No Prokka Description
																																										pSLT_00048	Prodigal:2.6	43240-43359	120	putative protein [Salmonella enterica subsp. enterica serovar Typhimurium str. DT104]
																																										pSLT_00048	prokka	43240-43359	120	No Prokka Description
p06D1274_00052	Prodigal:2.6	43849-44316	468	Conjugative transfer protein [Salmonella enterica]		p08D015_00052	Prodigal:2.6	43815-44282	468	Conjugative transfer protein [Salmonella enterica]		p08OTH027_00053	Prodigal:2.6	43907-44374	468	Conjugative transfer protein [Salmonella enterica]		p11OTH031_00052	Prodigal:2.6	43794-44261	468	Conjugative transfer protein [Salmonella enterica]		p12OTH012_00049	Prodigal:2.6	43880-44347	468	Conjugative transfer protein [Salmonella enterica]		p14OTH007_00050	Prodigal:2.6	43990-44457	468	Conjugative transfer protein [Salmonella enterica]								pSLT_00049	Prodigal:2.6	43356-43823	468	Conjugative transfer protein [Salmonella enterica]
p06D1274_00052	prokka	43849-44316	468	No Prokka Description		p08D015_00052	prokka	43815-44282	468	No Prokka Description		p08OTH027_00053	prokka	43907-44374	468	No Prokka Description		p11OTH031_00052	prokka	43794-44261	468	No Prokka Description		p12OTH012_00049	prokka	43880-44347	468	No Prokka Description		p14OTH007_00050	prokka	43990-44457	468	No Prokka Description								pSLT_00049	prokka	43356-43823	468	No Prokka Description
p06D1274_00053	Prodigal:2.6	44309-44530	222	Protein TraR		p08D015_00053	Prodigal:2.6	44275-44496	222	Protein TraR		p08OTH027_00054	Prodigal:2.6	44367-44588	222	Protein TraR		p11OTH031_00053	Prodigal:2.6	44254-44475	222	Protein TraR		p12OTH012_00050	Prodigal:2.6	44340-44561	222	Protein TraR		p14OTH007_00051	Prodigal:2.6	44450-44671	222	Protein TraR								pSLT_00050	Prodigal:2.6	43816-44037	222	Protein TraR
p06D1274_00053	prokka	44309-44530	222	traR		p08D015_00053	prokka	44275-44496	222	traR		p08OTH027_00054	prokka	44367-44588	222	traR		p11OTH031_00053	prokka	44254-44475	222	traR		p12OTH012_00050	prokka	44340-44561	222	traR		p14OTH007_00051	prokka	44450-44671	222	traR								pSLT_00050	prokka	43816-44037	222	traR
p06D1274_00054	Prodigal:2.6	44665-45180	516	Protein TraV		p08D015_00054	Prodigal:2.6	44631-45146	516	Protein TraV		p08OTH027_00055	Prodigal:2.6	44723-45238	516	Protein TraV		p11OTH031_00054	Prodigal:2.6	44610-45125	516	Protein TraV		p12OTH012_00051	Prodigal:2.6	44696-45211	516	Protein TraV		p14OTH007_00052	Prodigal:2.6	44806-45321	516	Protein TraV		pSEN_00024	Prodigal:2.6	17706-18038	333	Protein TraV		pSLT_00051	Prodigal:2.6	44172-44687	516	Protein TraV
p06D1274_00054	prokka	44665-45180	516	traV		p08D015_00054	prokka	44631-45146	516	traV		p08OTH027_00055	prokka	44723-45238	516	traV		p11OTH031_00054	prokka	44610-45125	516	traV		p12OTH012_00051	prokka	44696-45211	516	traV		p14OTH007_00052	prokka	44806-45321	516	traV		pSEN_00024	prokka	17706-18038	333	traV		pSLT_00051	prokka	44172-44687	516	traV
p06D1274_00054	SignalP:4.1	45112-45180	69	putative signal peptide		p08D015_00054	SignalP:4.1	45078-45146	69	putative signal peptide		p08OTH027_00055	SignalP:4.1	45170-45238	69	putative signal peptide		p11OTH031_00054	SignalP:4.1	45057-45125	69	putative signal peptide		p12OTH012_00051	SignalP:4.1	45143-45211	69	putative signal peptide		p14OTH007_00052	SignalP:4.1	45253-45321	69	putative signal peptide		pSEN_00024	SignalP:4.1	17970-18038	69	putative signal peptide		pSLT_00051	SignalP:4.1	44619-44687	69	putative signal peptide
p06D1274_00055	Prodigal:2.6	45177-45392	216	hypothetical protein		p08D015_00055	Prodigal:2.6	45143-45358	216	hypothetical protein		p08OTH027_00056	Prodigal:2.6	45235-45450	216	hypothetical protein		p11OTH031_00055	Prodigal:2.6	45122-45337	216	hypothetical protein		p12OTH012_00052	Prodigal:2.6	45208-45423	216	hypothetical protein		p14OTH007_00053	Prodigal:2.6	45318-45533	216	hypothetical protein		pSEN_00025	Prodigal:2.6	18035-18250	216	hypothetical protein		pSLT_00052	Prodigal:2.6	44684-44920	237	hypothetical protein
p06D1274_00055	prokka	45177-45392	216	No Prokka Description		p08D015_00055	prokka	45143-45358	216	No Prokka Description		p08OTH027_00056	prokka	45235-45450	216	No Prokka Description		p11OTH031_00055	prokka	45122-45337	216	No Prokka Description		p12OTH012_00052	prokka	45208-45423	216	No Prokka Description		p14OTH007_00053	prokka	45318-45533	216	No Prokka Description		pSEN_00025	prokka	18035-18250	216	No Prokka Description		pSLT_00052	prokka	44684-44920	237	No Prokka Description
p06D1274_00056	Prodigal:2.6	45379-45975	597	Conjugal transfer protein TraP [Salmonella enterica]		p08D015_00056	Prodigal:2.6	45345-45941	597	Conjugal transfer protein TraP [Salmonella enterica]		p08OTH027_00057	Prodigal:2.6	45437-46033	597	Conjugal transfer protein TraP [Salmonella enterica]		p11OTH031_00056	Prodigal:2.6	45324-45920	597	Conjugal transfer protein TraP [Salmonella enterica]		p12OTH012_00053	Prodigal:2.6	45410-46006	597	Conjugal transfer protein TraP [Salmonella enterica]		p14OTH007_00054	Prodigal:2.6	45520-46116	597	Conjugal transfer protein TraP [Salmonella enterica]		pSEN_00026	Prodigal:2.6	18237-18833	597	Conjugal transfer protein TraP [Salmonella enterica]		pSLT_00053	Prodigal:2.6	44907-45503	597	Conjugal transfer protein TraP [Salmonella enterica]
p06D1274_00056	prokka	45379-45975	597	No Prokka Description		p08D015_00056	prokka	45345-45941	597	No Prokka Description		p08OTH027_00057	prokka	45437-46033	597	No Prokka Description		p11OTH031_00056	prokka	45324-45920	597	No Prokka Description		p12OTH012_00053	prokka	45410-46006	597	No Prokka Description		p14OTH007_00054	prokka	45520-46116	597	No Prokka Description		pSEN_00026	prokka	18237-18833	597	No Prokka Description		pSLT_00053	prokka	44907-45503	597	No Prokka Description
p06D1274_00057	Prodigal:2.6	45965-47386	1422	Conjugal transfer protein TraB [Salmonella enterica]		p08D015_00057	Prodigal:2.6	45931-47352	1422	Conjugal transfer protein TraB [Salmonella enterica]		p08OTH027_00058	Prodigal:2.6	46023-47444	1422	Conjugal transfer protein TraB [Salmonella enterica]		p11OTH031_00057	Prodigal:2.6	45910-47331	1422	Conjugal transfer protein TraB [Salmonella enterica]		p12OTH012_00054	Prodigal:2.6	45996-47417	1422	Conjugal transfer protein TraB [Salmonella enterica]		p14OTH007_00055	Prodigal:2.6	46106-47527	1422	Conjugal transfer protein TraB [Salmonella enterica]		pSEN_00027	Prodigal:2.6	18823-20244	1422	Conjugal transfer protein TraB [Salmonella enterica]		pSLT_00054	Prodigal:2.6	45493-46914	1422	Conjugal transfer protein TraB [Salmonella enterica]
p06D1274_00057	prokka	45965-47386	1422	No Prokka Description		p08D015_00057	prokka	45931-47352	1422	No Prokka Description		p08OTH027_00058	prokka	46023-47444	1422	No Prokka Description		p11OTH031_00057	prokka	45910-47331	1422	No Prokka Description		p12OTH012_00054	prokka	45996-47417	1422	No Prokka Description		p14OTH007_00055	prokka	46106-47527	1422	No Prokka Description		pSEN_00027	prokka	18823-20244	1422	No Prokka Description		pSLT_00054	prokka	45493-46914	1422	No Prokka Description
p06D1274_00058	Prodigal:2.6	47386-48126	741	Type-f conjugative transfer system secretin TraK [Salmonella enterica]		p08D015_00058	Prodigal:2.6	47352-48092	741	Type-f conjugative transfer system secretin TraK [Salmonella enterica]		p08OTH027_00059	Prodigal:2.6	47444-48184	741	Type-f conjugative transfer system secretin TraK [Salmonella enterica]		p11OTH031_00058	Prodigal:2.6	47331-48071	741	Type-f conjugative transfer system secretin TraK [Salmonella enterica]		p12OTH012_00055	Prodigal:2.6	47417-48157	741	Type-f conjugative transfer system secretin TraK [Salmonella enterica]		p14OTH007_00056	Prodigal:2.6	47527-48267	741	Type-f conjugative transfer system secretin TraK [Salmonella enterica]		pSEN_00028	Prodigal:2.6	20244-20984	741	Type-f conjugative transfer system secretin TraK [Salmonella enterica]		pSLT_00055	Prodigal:2.6	46914-47654	741	Type-f conjugative transfer system secretin TraK [Salmonella enterica]
p06D1274_00058	prokka	47386-48126	741	No Prokka Description		p08D015_00058	prokka	47352-48092	741	No Prokka Description		p08OTH027_00059	prokka	47444-48184	741	No Prokka Description		p11OTH031_00058	prokka	47331-48071	741	No Prokka Description		p12OTH012_00055	prokka	47417-48157	741	No Prokka Description		p14OTH007_00056	prokka	47527-48267	741	No Prokka Description		pSEN_00028	prokka	20244-20984	741	No Prokka Description		pSLT_00055	prokka	46914-47654	741	No Prokka Description
p06D1274_00058	SignalP:4.1	48052-48126	75	putative signal peptide		p08D015_00058	SignalP:4.1	48018-48092	75	putative signal peptide		p08OTH027_00059	SignalP:4.1	48110-48184	75	putative signal peptide		p11OTH031_00058	SignalP:4.1	47997-48071	75	putative signal peptide		p12OTH012_00055	SignalP:4.1	48083-48157	75	putative signal peptide		p14OTH007_00056	SignalP:4.1	48193-48267	75	putative signal peptide		pSEN_00028	SignalP:4.1	20910-20984	75	putative signal peptide		pSLT_00055	SignalP:4.1	47580-47654	75	putative signal peptide
p06D1274_00059	Prodigal:2.6	48113-48679	567	Type IV conjugative transfer system protein TraE [Escherichia coli]		p08D015_00059	Prodigal:2.6	48079-48645	567	Type IV conjugative transfer system protein TraE [Escherichia coli]		p08OTH027_00060	Prodigal:2.6	48171-48737	567	Type IV conjugative transfer system protein TraE [Escherichia coli]		p11OTH031_00059	Prodigal:2.6	48058-48624	567	Type IV conjugative transfer system protein TraE [Escherichia coli]		p12OTH012_00056	Prodigal:2.6	48144-48710	567	Type IV conjugative transfer system protein TraE [Escherichia coli]		p14OTH007_00057	Prodigal:2.6	48254-48820	567	Type IV conjugative transfer system protein TraE [Escherichia coli]		pSEN_00029	Prodigal:2.6	20971-21537	567	Type IV conjugative transfer system protein TraE [Escherichia coli]		pSLT_00056	Prodigal:2.6	47641-48207	567	Type IV conjugative transfer system protein TraE [Escherichia coli]
p06D1274_00059	prokka	48113-48679	567	No Prokka Description		p08D015_00059	prokka	48079-48645	567	No Prokka Description		p08OTH027_00060	prokka	48171-48737	567	No Prokka Description		p11OTH031_00059	prokka	48058-48624	567	No Prokka Description		p12OTH012_00056	prokka	48144-48710	567	No Prokka Description		p14OTH007_00057	prokka	48254-48820	567	No Prokka Description		pSEN_00029	prokka	20971-21537	567	No Prokka Description		pSLT_00056	prokka	47641-48207	567	No Prokka Description
p06D1274_00060	Prodigal:2.6	48701-49012	312	Type IV conjugative transfer system protein TraL [Escherichia coli]		p08D015_00060	Prodigal:2.6	48667-48978	312	Type IV conjugative transfer system protein TraL [Escherichia coli]		p08OTH027_00061	Prodigal:2.6	48759-49070	312	Type IV conjugative transfer system protein TraL [Escherichia coli]		p11OTH031_00060	Prodigal:2.6	48646-48957	312	Type IV conjugative transfer system protein TraL [Escherichia coli]		p12OTH012_00057	Prodigal:2.6	48732-49043	312	Type IV conjugative transfer system protein TraL [Escherichia coli]		p14OTH007_00058	Prodigal:2.6	48842-49153	312	Type IV conjugative transfer system protein TraL [Escherichia coli]		pSEN_00030	Prodigal:2.6	21559-21870	312	Type IV conjugative transfer system protein TraL [Escherichia coli]		pSLT_00057	Prodigal:2.6	48229-48540	312	Type IV conjugative transfer system protein TraL [Escherichia coli]
p06D1274_00060	prokka	48701-49012	312	No Prokka Description		p08D015_00060	prokka	48667-48978	312	No Prokka Description		p08OTH027_00061	prokka	48759-49070	312	No Prokka Description		p11OTH031_00060	prokka	48646-48957	312	No Prokka Description		p12OTH012_00057	prokka	48732-49043	312	No Prokka Description		p14OTH007_00058	prokka	48842-49153	312	No Prokka Description		pSEN_00030	prokka	21559-21870	312	No Prokka Description		pSLT_00057	prokka	48229-48540	312	No Prokka Description
p06D1274_00061	Prodigal:2.6	49027-49389	363	Pilin		p08D015_00061	Prodigal:2.6	48993-49355	363	Pilin		p08OTH027_00062	Prodigal:2.6	49085-49447	363	Pilin		p11OTH031_00061	Prodigal:2.6	48972-49334	363	Pilin		p12OTH012_00058	Prodigal:2.6	49058-49420	363	Pilin		p14OTH007_00059	Prodigal:2.6	49168-49530	363	Pilin		pSEN_00031	Prodigal:2.6	21885-22247	363	Pilin		pSLT_00058	Prodigal:2.6	48555-48917	363	Pilin
p06D1274_00061	prokka	49027-49389	363	traA		p08D015_00061	prokka	48993-49355	363	traA		p08OTH027_00062	prokka	49085-49447	363	traA		p11OTH031_00061	prokka	48972-49334	363	traA		p12OTH012_00058	prokka	49058-49420	363	traA		p14OTH007_00059	prokka	49168-49530	363	traA		pSEN_00031	prokka	21885-22247	363	traA		pSLT_00058	prokka	48555-48917	363	traA
p06D1274_00062	Prodigal:2.6	49431-49658	228	Relaxosome protein TraY		p08D015_00062	Prodigal:2.6	49397-49624	228	Relaxosome protein TraY		p08OTH027_00063	Prodigal:2.6	49489-49716	228	Relaxosome protein TraY		p11OTH031_00062	Prodigal:2.6	49376-49603	228	Relaxosome protein TraY		p12OTH012_00059	Prodigal:2.6	49462-49689	228	Relaxosome protein TraY		p14OTH007_00060	Prodigal:2.6	49572-49799	228	Relaxosome protein TraY		pSEN_00032	Prodigal:2.6	22289-22516	228	Relaxosome protein TraY		pSLT_00059	Prodigal:2.6	48959-49186	228	Relaxosome protein TraY
p06D1274_00062	prokka	49431-49658	228	traY		p08D015_00062	prokka	49397-49624	228	traY		p08OTH027_00063	prokka	49489-49716	228	traY		p11OTH031_00062	prokka	49376-49603	228	traY		p12OTH012_00059	prokka	49462-49689	228	traY		p14OTH007_00060	prokka	49572-49799	228	traY		pSEN_00032	prokka	22289-22516	228	traY		pSLT_00059	prokka	48959-49186	228	traY
p06D1274_00063	Prodigal:2.6	49753-50439	687	Protein TraJ		p08D015_00063	Prodigal:2.6	49718-50404	687	Protein TraJ		p08OTH027_00064	Prodigal:2.6	49810-50496	687	Protein TraJ		p11OTH031_00063	Prodigal:2.6	49697-50383	687	Protein TraJ		p12OTH012_00060	Prodigal:2.6	49783-50469	687	Protein TraJ		p14OTH007_00061	Prodigal:2.6	49893-50579	687	Protein TraJ		pSEN_00033	Prodigal:2.6	22984-23295	312	Protein TraJ		pSLT_00060	Prodigal:2.6	49280-49966	687	Protein TraJ
p06D1274_00063	prokka	49753-50439	687	traJ		p08D015_00063	prokka	49718-50404	687	traJ		p08OTH027_00064	prokka	49810-50496	687	traJ		p11OTH031_00063	prokka	49697-50383	687	traJ		p12OTH012_00060	prokka	49783-50469	687	traJ		p14OTH007_00061	prokka	49893-50579	687	traJ		pSEN_00033	prokka	22984-23295	312	traJ		pSLT_00060	prokka	49280-49966	687	traJ
p06D1274_00064	Infernal:1.1	50433-50508	76	FinP		p08D015_00064	Infernal:1.1	50398-50473	76	FinP		p08OTH027_00065	Infernal:1.1	50490-50565	76	FinP		p11OTH031_00064	Infernal:1.1	50377-50452	76	FinP		p12OTH012_00061	Infernal:1.1	50463-50538	76	FinP		p14OTH007_00062	Infernal:1.1	50573-50648	76	FinP		pSEN_00034	Infernal:1.1	23289-23365	77	FinP		pSLT_00061	Infernal:1.1	49960-50035	76	FinP
p06D1274_00064	prokka	50433-50508	76	No Prokka Description		p08D015_00064	prokka	50398-50473	76	No Prokka Description		p08OTH027_00065	prokka	50490-50565	76	No Prokka Description		p11OTH031_00064	prokka	50377-50452	76	No Prokka Description		p12OTH012_00061	prokka	50463-50538	76	No Prokka Description		p14OTH007_00062	prokka	50573-50648	76	No Prokka Description		pSEN_00034	prokka	23289-23365	77	No Prokka Description		pSLT_00061	prokka	49960-50035	76	No Prokka Description
p06D1274_00065	Infernal:1.1	50434-50538	105	traJ_5		p08D015_00065	Infernal:1.1	50399-50503	105	traJ_5		p08OTH027_00066	Infernal:1.1	50491-50595	105	traJ_5		p11OTH031_00065	Infernal:1.1	50378-50482	105	traJ_5		p12OTH012_00062	Infernal:1.1	50464-50568	105	traJ_5		p14OTH007_00063	Infernal:1.1	50574-50678	105	traJ_5		pSEN_00035	Infernal:1.1	23290-23396	107	traJ_5		pSLT_00062	Infernal:1.1	49961-50066	106	traJ_5
p06D1274_00065	prokka	50434-50538	105	No Prokka Description		p08D015_00065	prokka	50399-50503	105	No Prokka Description		p08OTH027_00066	prokka	50491-50595	105	No Prokka Description		p11OTH031_00065	prokka	50378-50482	105	No Prokka Description		p12OTH012_00062	prokka	50464-50568	105	No Prokka Description		p14OTH007_00063	prokka	50574-50678	105	No Prokka Description		pSEN_00035	prokka	23290-23396	107	No Prokka Description		pSLT_00062	prokka	49961-50066	106	No Prokka Description
p06D1274_00066	Prodigal:2.6	50631-51011	381	Relaxosome protein TraM		p08D015_00066	Prodigal:2.6	50596-50976	381	Relaxosome protein TraM		p08OTH027_00067	Prodigal:2.6	50688-51068	381	Relaxosome protein TraM		p11OTH031_00066	Prodigal:2.6	50575-50955	381	Relaxosome protein TraM		p12OTH012_00063	Prodigal:2.6	50661-51041	381	Relaxosome protein TraM		p14OTH007_00064	Prodigal:2.6	50771-51151	381	Relaxosome protein TraM		pSEN_00036	Prodigal:2.6	23489-23869	381	Relaxosome protein TraM		pSLT_00063	Prodigal:2.6	50159-50539	381	Relaxosome protein TraM
p06D1274_00066	prokka	50631-51011	381	traM		p08D015_00066	prokka	50596-50976	381	traM		p08OTH027_00067	prokka	50688-51068	381	traM		p11OTH031_00066	prokka	50575-50955	381	traM		p12OTH012_00063	prokka	50661-51041	381	traM		p14OTH007_00064	prokka	50771-51151	381	traM		pSEN_00036	prokka	23489-23869	381	traM		pSLT_00063	prokka	50159-50539	381	traM
p06D1274_00067	Prodigal:2.6	51427-51897	471	Transglycosylase [Salmonella enterica]		p08D015_00067	Prodigal:2.6	51392-51862	471	Transglycosylase [Salmonella enterica]		p08OTH027_00068	Prodigal:2.6	51484-51954	471	Transglycosylase [Salmonella enterica]		p11OTH031_00067	Prodigal:2.6	51371-51841	471	Transglycosylase [Salmonella enterica]		p12OTH012_00064	Prodigal:2.6	51457-51927	471	Transglycosylase [Salmonella enterica]		p14OTH007_00065	Prodigal:2.6	51567-52037	471	Transglycosylase [Salmonella enterica]		pSEN_00037	Prodigal:2.6	24285-24755	471	Transglycosylase [Salmonella enterica]		pSLT_00064	Prodigal:2.6	50954-51424	471	Lytic transglycosylase [Salmonella enterica]
p06D1274_00067	SignalP:4.1	51427-51486	60	putative signal peptide		p08D015_00067	SignalP:4.1	51392-51451	60	putative signal peptide		p08OTH027_00068	SignalP:4.1	51484-51543	60	putative signal peptide		p11OTH031_00067	SignalP:4.1	51371-51430	60	putative signal peptide		p12OTH012_00064	SignalP:4.1	51457-51516	60	putative signal peptide		p14OTH007_00065	SignalP:4.1	51567-51626	60	putative signal peptide		pSEN_00037	SignalP:4.1	24285-24344	60	putative signal peptide		pSLT_00064	SignalP:4.1	50954-51013	60	putative signal peptide
p06D1274_00067	prokka	51427-51897	471	No Prokka Description		p08D015_00067	prokka	51392-51862	471	No Prokka Description		p08OTH027_00068	prokka	51484-51954	471	No Prokka Description		p11OTH031_00067	prokka	51371-51841	471	No Prokka Description		p12OTH012_00064	prokka	51457-51927	471	No Prokka Description		p14OTH007_00065	prokka	51567-52037	471	No Prokka Description		pSEN_00037	prokka	24285-24755	471	No Prokka Description		pSLT_00064	prokka	50954-51424	471	No Prokka Description
p06D1274_00068	Prodigal:2.6	52419-52709	291	hypothetical protein		p08D015_00068	Prodigal:2.6	52385-52675	291	hypothetical protein		p08OTH027_00069	Prodigal:2.6	52477-52767	291	hypothetical protein		p11OTH031_00068	Prodigal:2.6	52364-52654	291	hypothetical protein		p12OTH012_00065	Prodigal:2.6	52450-52740	291	hypothetical protein		p14OTH007_00066	Prodigal:2.6	52560-52850	291	hypothetical protein		pSEN_00038	Prodigal:2.6	25278-25568	291	hypothetical protein		pSLT_00065	Prodigal:2.6	51947-52237	291	hypothetical protein
p06D1274_00068	prokka	52419-52709	291	No Prokka Description		p08D015_00068	prokka	52385-52675	291	No Prokka Description		p08OTH027_00069	prokka	52477-52767	291	No Prokka Description		p11OTH031_00068	prokka	52364-52654	291	No Prokka Description		p12OTH012_00065	prokka	52450-52740	291	No Prokka Description		p14OTH007_00066	prokka	52560-52850	291	No Prokka Description		pSEN_00038	prokka	25278-25568	291	No Prokka Description		pSLT_00065	prokka	51947-52237	291	No Prokka Description
p06D1274_00069	Prodigal:2.6	52756-53025	270	hypothetical protein		p08D015_00069	Prodigal:2.6	52722-52991	270	hypothetical protein		p08OTH027_00070	Prodigal:2.6	52814-53083	270	hypothetical protein		p11OTH031_00069	Prodigal:2.6	52701-52970	270	hypothetical protein		p12OTH012_00066	Prodigal:2.6	52787-53056	270	hypothetical protein		p14OTH007_00067	Prodigal:2.6	52897-53166	270	hypothetical protein		pSEN_00039	Prodigal:2.6	25615-25884	270	hypothetical protein		pSLT_00066	Prodigal:2.6	52284-52553	270	hypothetical protein
p06D1274_00069	prokka	52756-53025	270	No Prokka Description		p08D015_00069	prokka	52722-52991	270	No Prokka Description		p08OTH027_00070	prokka	52814-53083	270	No Prokka Description		p11OTH031_00069	prokka	52701-52970	270	No Prokka Description		p12OTH012_00066	prokka	52787-53056	270	No Prokka Description		p14OTH007_00067	prokka	52897-53166	270	No Prokka Description		pSEN_00039	prokka	25615-25884	270	No Prokka Description		pSLT_00066	prokka	52284-52553	270	No Prokka Description
p06D1274_00070	Prodigal:2.6	53128-53286	159	putative protein [Salmonella enterica subsp. enterica]		p08D015_00070	Prodigal:2.6	53094-53252	159	putative protein [Salmonella enterica subsp. enterica]		p08OTH027_00071	Prodigal:2.6	53186-53344	159	putative protein [Salmonella enterica subsp. enterica]		p11OTH031_00070	Prodigal:2.6	53073-53231	159	putative protein [Salmonella enterica subsp. enterica]		p12OTH012_00067	Prodigal:2.6	53159-53317	159	putative protein [Salmonella enterica subsp. enterica]		p14OTH007_00068	Prodigal:2.6	53269-53427	159	putative protein [Salmonella enterica subsp. enterica]		pSEN_00040	Prodigal:2.6	25987-26145	159	putative protein [Salmonella enterica subsp. enterica]		pSLT_00067	Prodigal:2.6	52656-52814	159	putative protein [Salmonella enterica subsp. enterica]
p06D1274_00070	prokka	53128-53286	159	No Prokka Description		p08D015_00070	prokka	53094-53252	159	No Prokka Description		p08OTH027_00071	prokka	53186-53344	159	No Prokka Description		p11OTH031_00070	prokka	53073-53231	159	No Prokka Description		p12OTH012_00067	prokka	53159-53317	159	No Prokka Description		p14OTH007_00068	prokka	53269-53427	159	No Prokka Description		pSEN_00040	prokka	25987-26145	159	No Prokka Description		pSLT_00067	prokka	52656-52814	159	No Prokka Description
p06D1274_00071	Prodigal:2.6	53535-54194	660	Plasmid SOS inhibition protein A [Salmonella enterica]		p08D015_00071	Prodigal:2.6	53501-54160	660	Plasmid SOS inhibition protein A [Salmonella enterica]		p08OTH027_00072	Prodigal:2.6	53593-54252	660	Plasmid SOS inhibition protein A [Salmonella enterica]		p11OTH031_00071	Prodigal:2.6	53480-54139	660	Plasmid SOS inhibition protein A [Salmonella enterica]		p12OTH012_00068	Prodigal:2.6	53566-54225	660	Plasmid SOS inhibition protein A [Salmonella enterica]		p14OTH007_00069	Prodigal:2.6	53676-54335	660	Plasmid SOS inhibition protein A [Salmonella enterica]		pSEN_00041	Prodigal:2.6	26394-27053	660	Plasmid SOS inhibition protein A [Salmonella enterica]		pSLT_00068	Prodigal:2.6	53063-53800	738	Plasmid SOS inhibition protein A [Salmonella enterica]
p06D1274_00071	prokka	53535-54194	660	No Prokka Description		p08D015_00071	prokka	53501-54160	660	No Prokka Description		p08OTH027_00072	prokka	53593-54252	660	No Prokka Description		p11OTH031_00071	prokka	53480-54139	660	No Prokka Description		p12OTH012_00068	prokka	53566-54225	660	No Prokka Description		p14OTH007_00069	prokka	53676-54335	660	No Prokka Description		pSEN_00041	prokka	26394-27053	660	No Prokka Description		pSLT_00068	prokka	53063-53800	738	No Prokka Description
																																										pSLT_00069	Prodigal:2.6	53797-54228	432	Protein PsiB
																																										pSLT_00069	prokka	53797-54228	432	psiB
																																										pSLT_00070	Prodigal:2.6	54271-56268	1998	Chromosome-partitioning protein Spo0J
																																										pSLT_00070	prokka	54271-56268	1998	spo0C
																																										pSLT_00071	Prodigal:2.6	56337-56579	243	hypothetical protein
																																										pSLT_00071	prokka	56337-56579	243	No Prokka Description
																																										pSLT_00072	Prodigal:2.6	56634-57152	519	Single-stranded DNA-binding protein
																																										pSLT_00072	prokka	56634-57152	519	ssb
																																										pSLT_00073	Prodigal:2.6	57746-57907	162	putative protein [Salmonella enterica subsp. enterica serovar Typhimurium str. DT104]
																																										pSLT_00073	prokka	57746-57907	162	No Prokka Description
																																										pSLT_00074	Prodigal:2.6	57871-58194	324	DNA polymerase III subunit theta
																																										pSLT_00074	prokka	57871-58194	324	holE
																																										pSLT_00075	Prodigal:2.6	58430-58864	435	hypothetical protein
																																										pSLT_00075	prokka	58430-58864	435	No Prokka Description
																																										pSLT_00076	Prodigal:2.6	58931-59365	435	Antirestriction protein KlcA
																																										pSLT_00076	prokka	58931-59365	435	klcA
																																										pSLT_00077	Prodigal:2.6	59861-60625	765	Membrane protein [Salmonella enterica]
																																										pSLT_00077	prokka	59861-60625	765	No Prokka Description
																																										pSLT_00078	Prodigal:2.6	60697-61110	414	hypothetical protein
																																										pSLT_00078	prokka	60697-61110	414	No Prokka Description
																																										pSLT_00079	Prodigal:2.6	61166-61387	222	hypothetical protein
																																										pSLT_00079	prokka	61166-61387	222	No Prokka Description
																																										pSLT_00080	Prodigal:2.6	61387-62067	681	DNA adenine methyltransferase YhdJ
																																										pSLT_00080	prokka	61387-62067	681	yhdJ
																																										pSLT_00081	Prodigal:2.6	62449-62805	357	putative protein [Citrobacter freundii]
																																										pSLT_00081	prokka	62449-62805	357	No Prokka Description
																																										pSLT_00082	Prodigal:2.6	62798-63268	471	putative protein [Salmonella enterica subsp. enterica serovar Typhimurium str. DT104]
																																										pSLT_00082	prokka	62798-63268	471	No Prokka Description
p06D1274_00072	Prodigal:2.6	54335-56086	1752	Parb/repb/spo0j family partition protein [Salmonella enterica]		p08D015_00072	Prodigal:2.6	54301-56052	1752	Parb/repb/spo0j family partition protein [Salmonella enterica]		p08OTH027_00073	Prodigal:2.6	54393-56144	1752	Parb/repb/spo0j family partition protein [Salmonella enterica]		p11OTH031_00072	Prodigal:2.6	54280-56031	1752	Parb/repb/spo0j family partition protein [Salmonella enterica]		p12OTH012_00069	Prodigal:2.6	54366-56117	1752	Parb/repb/spo0j family partition protein [Salmonella enterica]		p14OTH007_00070	Prodigal:2.6	54476-56227	1752	Parb/repb/spo0j family partition protein [Salmonella enterica]		pSEN_00042	Prodigal:2.6	27194-28945	1752	Parb/repb/spo0j family partition protein [Salmonella enterica]
p06D1274_00072	prokka	54335-56086	1752	No Prokka Description		p08D015_00072	prokka	54301-56052	1752	No Prokka Description		p08OTH027_00073	prokka	54393-56144	1752	No Prokka Description		p11OTH031_00072	prokka	54280-56031	1752	No Prokka Description		p12OTH012_00069	prokka	54366-56117	1752	No Prokka Description		p14OTH007_00070	prokka	54476-56227	1752	No Prokka Description		pSEN_00042	prokka	27194-28945	1752	No Prokka Description
p06D1274_00073	Prodigal:2.6	56357-56779	423	Protein UmuD		p08D015_00073	Prodigal:2.6	56323-56745	423	Protein UmuD		p08OTH027_00074	Prodigal:2.6	56415-56837	423	Protein UmuD		p11OTH031_00073	Prodigal:2.6	56302-56724	423	Protein UmuD		p12OTH012_00070	Prodigal:2.6	56388-56810	423	Protein UmuD		p14OTH007_00071	Prodigal:2.6	56498-56920	423	Protein UmuD		pSEN_00043	Prodigal:2.6	29216-29638	423	Protein UmuD		pSLT_00083	Prodigal:2.6	63779-64201	423	Protein UmuD
p06D1274_00073	prokka	56357-56779	423	umuD		p08D015_00073	prokka	56323-56745	423	umuD		p08OTH027_00074	prokka	56415-56837	423	umuD		p11OTH031_00073	prokka	56302-56724	423	umuD		p12OTH012_00070	prokka	56388-56810	423	umuD		p14OTH007_00071	prokka	56498-56920	423	umuD		pSEN_00043	prokka	29216-29638	423	umuD		pSLT_00083	prokka	63779-64201	423	umuD
p06D1274_00074	Prodigal:2.6	56779-58053	1275	Protein UmuC		p08D015_00074	Prodigal:2.6	56745-58019	1275	Protein UmuC		p08OTH027_00075	Prodigal:2.6	56837-58111	1275	Protein UmuC		p11OTH031_00074	Prodigal:2.6	56724-57998	1275	Protein UmuC		p12OTH012_00071	Prodigal:2.6	56810-58084	1275	Protein UmuC		p14OTH007_00072	Prodigal:2.6	56920-58194	1275	Protein UmuC		pSEN_00044	Prodigal:2.6	29638-30912	1275	Protein UmuC		pSLT_00084	Prodigal:2.6	64201-65475	1275	Protein UmuC
p06D1274_00074	prokka	56779-58053	1275	umuC		p08D015_00074	prokka	56745-58019	1275	umuC		p08OTH027_00075	prokka	56837-58111	1275	umuC		p11OTH031_00074	prokka	56724-57998	1275	umuC		p12OTH012_00071	prokka	56810-58084	1275	umuC		p14OTH007_00072	prokka	56920-58194	1275	umuC		pSEN_00044	prokka	29638-30912	1275	umuC		pSLT_00084	prokka	64201-65475	1275	umuC
p06D1274_00075	Prodigal:2.6	58134-59108	975	Virulence regulon transcriptional activator VirB		p08D015_00075	Prodigal:2.6	58101-59075	975	Virulence regulon transcriptional activator VirB		p08OTH027_00076	Prodigal:2.6	58193-59167	975	Virulence regulon transcriptional activator VirB		p11OTH031_00075	Prodigal:2.6	58080-59054	975	Virulence regulon transcriptional activator VirB		p12OTH012_00072	Prodigal:2.6	58166-59140	975	Virulence regulon transcriptional activator VirB		p14OTH007_00073	Prodigal:2.6	58276-59250	975	Virulence regulon transcriptional activator VirB		pSEN_00045	Prodigal:2.6	30994-31968	975	Virulence regulon transcriptional activator VirB		pSLT_00085	Prodigal:2.6	65557-66531	975	Virulence regulon transcriptional activator VirB
p06D1274_00075	prokka	58134-59108	975	virB		p08D015_00075	prokka	58101-59075	975	virB		p08OTH027_00076	prokka	58193-59167	975	virB		p11OTH031_00075	prokka	58080-59054	975	virB		p12OTH012_00072	prokka	58166-59140	975	virB		p14OTH007_00073	prokka	58276-59250	975	virB		pSEN_00045	prokka	30994-31968	975	virB		pSLT_00085	prokka	65557-66531	975	virB
p06D1274_00076	Prodigal:2.6	59108-60313	1206	Plasmid partition protein A		p08D015_00076	Prodigal:2.6	59075-60280	1206	Plasmid partition protein A		p08OTH027_00077	Prodigal:2.6	59167-60372	1206	Plasmid partition protein A		p11OTH031_00076	Prodigal:2.6	59054-60259	1206	Plasmid partition protein A		p12OTH012_00073	Prodigal:2.6	59140-60345	1206	Plasmid partition protein A		p14OTH007_00074	Prodigal:2.6	59250-60455	1206	Plasmid partition protein A		pSEN_00046	Prodigal:2.6	31968-33173	1206	Plasmid partition protein A		pSLT_00086	Prodigal:2.6	66531-67736	1206	Plasmid partition protein A
p06D1274_00076	prokka	59108-60313	1206	parA		p08D015_00076	prokka	59075-60280	1206	parA		p08OTH027_00077	prokka	59167-60372	1206	parA		p11OTH031_00076	prokka	59054-60259	1206	parA		p12OTH012_00073	prokka	59140-60345	1206	parA		p14OTH007_00074	prokka	59250-60455	1206	parA		pSEN_00046	prokka	31968-33173	1206	parA		pSLT_00086	prokka	66531-67736	1206	parA
																																										pSLT_00087	Prodigal:2.6	67870-68010	141	putative protein [Salmonella enterica subsp. enterica serovar Weltevreden]
																																										pSLT_00087	prokka	67870-68010	141	No Prokka Description
p06D1274_00077	Prodigal:2.6	60728-61669	942	Recombination-promoting nuclease RpnA		p08D015_00077	Prodigal:2.6	60695-61636	942	Recombination-promoting nuclease RpnA		p08OTH027_00078	Prodigal:2.6	60787-61728	942	Recombination-promoting nuclease RpnA		p11OTH031_00077	Prodigal:2.6	60674-61615	942	Recombination-promoting nuclease RpnA		p12OTH012_00074	Prodigal:2.6	60760-61701	942	Recombination-promoting nuclease RpnA		p14OTH007_00075	Prodigal:2.6	60870-61811	942	Recombination-promoting nuclease RpnA		pSEN_00047	Prodigal:2.6	33588-34529	942	Recombination-promoting nuclease RpnA		pSLT_00088	Prodigal:2.6	68151-69092	942	Recombination-promoting nuclease RpnA
p06D1274_00077	prokka	60728-61669	942	rpnA		p08D015_00077	prokka	60695-61636	942	rpnA		p08OTH027_00078	prokka	60787-61728	942	rpnA		p11OTH031_00077	prokka	60674-61615	942	rpnA		p12OTH012_00074	prokka	60760-61701	942	rpnA		p14OTH007_00075	prokka	60870-61811	942	rpnA		pSEN_00047	prokka	33588-34529	942	rpnA		pSLT_00088	prokka	68151-69092	942	rpnA
p06D1274_00078	Prodigal:2.6	61666-62271	606	hypothetical protein		p08D015_00078	Prodigal:2.6	61633-62238	606	hypothetical protein		p08OTH027_00079	Prodigal:2.6	61725-62330	606	hypothetical protein		p11OTH031_00078	Prodigal:2.6	61612-62217	606	hypothetical protein		p12OTH012_00075	Prodigal:2.6	61698-62303	606	hypothetical protein		p14OTH007_00076	Prodigal:2.6	61808-62413	606	hypothetical protein		pSEN_00048	Prodigal:2.6	34526-35131	606	hypothetical protein		pSLT_00089	Prodigal:2.6	69124-69690	567	hypothetical protein
p06D1274_00078	prokka	61666-62271	606	No Prokka Description		p08D015_00078	prokka	61633-62238	606	No Prokka Description		p08OTH027_00079	prokka	61725-62330	606	No Prokka Description		p11OTH031_00078	prokka	61612-62217	606	No Prokka Description		p12OTH012_00075	prokka	61698-62303	606	No Prokka Description		p14OTH007_00076	prokka	61808-62413	606	No Prokka Description		pSEN_00048	prokka	34526-35131	606	No Prokka Description		pSLT_00089	prokka	69124-69690	567	No Prokka Description
p06D1274_00079	Prodigal:2.6	62328-62663	336	putative protein [Salmonella enterica subsp. enterica serovar Typhimurium str. DT104]		p08D015_00079	Prodigal:2.6	62295-62630	336	putative protein [Salmonella enterica subsp. enterica serovar Typhimurium str. DT104]		p08OTH027_00080	Prodigal:2.6	62387-62722	336	putative protein [Salmonella enterica subsp. enterica serovar Typhimurium str. DT104]		p11OTH031_00079	Prodigal:2.6	62274-62609	336	putative protein [Salmonella enterica subsp. enterica serovar Typhimurium str. DT104]		p12OTH012_00076	Prodigal:2.6	62360-62695	336	putative protein [Salmonella enterica subsp. enterica serovar Typhimurium str. DT104]		p14OTH007_00077	Prodigal:2.6	62470-62805	336	putative protein [Salmonella enterica subsp. enterica serovar Typhimurium str. DT104]		pSEN_00049	Prodigal:2.6	35188-35523	336	hypothetical protein		pSLT_00090	Prodigal:2.6	69747-70082	336	hypothetical protein
p06D1274_00079	prokka	62328-62663	336	No Prokka Description		p08D015_00079	prokka	62295-62630	336	No Prokka Description		p08OTH027_00080	prokka	62387-62722	336	No Prokka Description		p11OTH031_00079	prokka	62274-62609	336	No Prokka Description		p12OTH012_00076	prokka	62360-62695	336	No Prokka Description		p14OTH007_00077	prokka	62470-62805	336	No Prokka Description		pSEN_00049	prokka	35188-35523	336	No Prokka Description		pSLT_00090	prokka	69747-70082	336	No Prokka Description
p06D1274_00080	Prodigal:2.6	62847-63356	510	3'-5' exonuclease [Salmonella enterica]		p08D015_00080	Prodigal:2.6	62814-63323	510	3'-5' exonuclease [Salmonella enterica]		p08OTH027_00081	Prodigal:2.6	62906-63415	510	3'-5' exonuclease [Salmonella enterica]		p11OTH031_00080	Prodigal:2.6	62793-63302	510	3'-5' exonuclease [Salmonella enterica]		p12OTH012_00077	Prodigal:2.6	62879-63388	510	3'-5' exonuclease [Salmonella enterica]		p14OTH007_00078	Prodigal:2.6	62989-63498	510	3'-5' exonuclease [Salmonella enterica]		pSEN_00050	Prodigal:2.6	35707-36216	510	3'-5' exonuclease [Salmonella enterica]		pSLT_00091	Prodigal:2.6	70266-70775	510	3'-5' exonuclease [Salmonella enterica]
p06D1274_00080	prokka	62847-63356	510	No Prokka Description		p08D015_00080	prokka	62814-63323	510	No Prokka Description		p08OTH027_00081	prokka	62906-63415	510	No Prokka Description		p11OTH031_00080	prokka	62793-63302	510	No Prokka Description		p12OTH012_00077	prokka	62879-63388	510	No Prokka Description		p14OTH007_00078	prokka	62989-63498	510	No Prokka Description		pSEN_00050	prokka	35707-36216	510	No Prokka Description		pSLT_00091	prokka	70266-70775	510	No Prokka Description
p06D1274_00081	Prodigal:2.6	63349-64464	1116	Chromosome partition protein Smc		p08D015_00081	Prodigal:2.6	63316-64431	1116	Chromosome partition protein Smc		p08OTH027_00082	Prodigal:2.6	63408-64523	1116	Chromosome partition protein Smc		p11OTH031_00081	Prodigal:2.6	63295-64410	1116	Chromosome partition protein Smc		p12OTH012_00078	Prodigal:2.6	63381-64496	1116	Chromosome partition protein Smc		p14OTH007_00079	Prodigal:2.6	63491-64606	1116	Chromosome partition protein Smc		pSEN_00051	Prodigal:2.6	36209-37324	1116	Chromosome partition protein Smc		pSLT_00092	Prodigal:2.6	70768-71883	1116	Chromosome partition protein Smc
p06D1274_00081	prokka	63349-64464	1116	smc		p08D015_00081	prokka	63316-64431	1116	smc		p08OTH027_00082	prokka	63408-64523	1116	smc		p11OTH031_00081	prokka	63295-64410	1116	smc		p12OTH012_00078	prokka	63381-64496	1116	smc		p14OTH007_00079	prokka	63491-64606	1116	smc		pSEN_00051	prokka	36209-37324	1116	smc		pSLT_00092	prokka	70768-71883	1116	smc
p06D1274_00082	Prodigal:2.6	64722-65210	489	Cytoplasmic protein [Salmonella enterica]		p08D015_00082	Prodigal:2.6	64689-65177	489	Cytoplasmic protein [Salmonella enterica]		p08OTH027_00083	Prodigal:2.6	64781-65269	489	Cytoplasmic protein [Salmonella enterica]		p11OTH031_00082	Prodigal:2.6	64668-65156	489	Cytoplasmic protein [Salmonella enterica]		p12OTH012_00079	Prodigal:2.6	64754-65242	489	Cytoplasmic protein [Salmonella enterica]		p14OTH007_00080	Prodigal:2.6	64864-65352	489	Cytoplasmic protein [Salmonella enterica]		pSEN_00052	Prodigal:2.6	37582-38070	489	Cytoplasmic protein [Salmonella enterica]		pSLT_00093	Prodigal:2.6	72142-72630	489	Cytoplasmic protein [Salmonella enterica]
p06D1274_00082	prokka	64722-65210	489	No Prokka Description		p08D015_00082	prokka	64689-65177	489	No Prokka Description		p08OTH027_00083	prokka	64781-65269	489	No Prokka Description		p11OTH031_00082	prokka	64668-65156	489	No Prokka Description		p12OTH012_00079	prokka	64754-65242	489	No Prokka Description		p14OTH007_00080	prokka	64864-65352	489	No Prokka Description		pSEN_00052	prokka	37582-38070	489	No Prokka Description		pSLT_00093	prokka	72142-72630	489	No Prokka Description
p06D1274_00083	Prodigal:2.6	65865-66605	741	Carbonic anhydrase		p08D015_00083	Prodigal:2.6	65832-66572	741	Carbonic anhydrase		p08OTH027_00084	Prodigal:2.6	65924-66664	741	Carbonic anhydrase		p11OTH031_00083	Prodigal:2.6	65811-66551	741	Carbonic anhydrase		p12OTH012_00080	Prodigal:2.6	65897-66637	741	Carbonic anhydrase		p14OTH007_00081	Prodigal:2.6	66007-66747	741	Carbonic anhydrase		pSEN_00053	Prodigal:2.6	38725-39465	741	Carbonic anhydrase		pSLT_00094	Prodigal:2.6	73285-74025	741	Carbonic anhydrase
p06D1274_00083	prokka	65865-66605	741	cynT		p08D015_00083	prokka	65832-66572	741	cynT		p08OTH027_00084	prokka	65924-66664	741	cynT		p11OTH031_00083	prokka	65811-66551	741	cynT		p12OTH012_00080	prokka	65897-66637	741	cynT		p14OTH007_00081	prokka	66007-66747	741	cynT		pSEN_00053	prokka	38725-39465	741	cynT		pSLT_00094	prokka	73285-74025	741	cynT
p06D1274_00084	Prodigal:2.6	66812-67372	561	DNA-invertase hin		p08D015_00084	Prodigal:2.6	66779-67339	561	DNA-invertase hin		p08OTH027_00085	Prodigal:2.6	66871-67431	561	DNA-invertase hin		p11OTH031_00084	Prodigal:2.6	66758-67318	561	DNA-invertase hin		p12OTH012_00081	Prodigal:2.6	66844-67404	561	DNA-invertase hin		p14OTH007_00082	Prodigal:2.6	66954-67514	561	DNA-invertase hin		pSEN_00054	Prodigal:2.6	39672-40232	561	DNA-invertase hin		pSLT_00095	Prodigal:2.6	74232-74792	561	Transposon Tn3 resolvase
p06D1274_00084	prokka	66812-67372	561	hin		p08D015_00084	prokka	66779-67339	561	hin		p08OTH027_00085	prokka	66871-67431	561	hin		p11OTH031_00084	prokka	66758-67318	561	hin		p12OTH012_00081	prokka	66844-67404	561	hin		p14OTH007_00082	prokka	66954-67514	561	hin		pSEN_00054	prokka	39672-40232	561	hin		pSLT_00095	prokka	74232-74792	561	tnpR
p06D1274_00085	Prodigal:2.6	67356-69020	1665	Is481 family transposase [Salmonella enterica]		p08D015_00085	Prodigal:2.6	67323-68987	1665	Is481 family transposase [Salmonella enterica]		p08OTH027_00086	Prodigal:2.6	67415-69079	1665	Is481 family transposase [Salmonella enterica]		p11OTH031_00085	Prodigal:2.6	67302-68966	1665	Is481 family transposase [Salmonella enterica]		p12OTH012_00082	Prodigal:2.6	67388-69052	1665	Is481 family transposase [Salmonella enterica]		p14OTH007_00083	Prodigal:2.6	67498-69162	1665	Is481 family transposase [Salmonella enterica]		pSEN_00055	Prodigal:2.6	40216-41880	1665	Is481 family transposase [Salmonella enterica]		pSLT_00096	Prodigal:2.6	74776-76440	1665	Is481 family transposase [Salmonella enterica]
p06D1274_00085	prokka	67356-69020	1665	No Prokka Description		p08D015_00085	prokka	67323-68987	1665	No Prokka Description		p08OTH027_00086	prokka	67415-69079	1665	No Prokka Description		p11OTH031_00085	prokka	67302-68966	1665	No Prokka Description		p12OTH012_00082	prokka	67388-69052	1665	No Prokka Description		p14OTH007_00083	prokka	67498-69162	1665	No Prokka Description		pSEN_00055	prokka	40216-41880	1665	No Prokka Description		pSLT_00096	prokka	74776-76440	1665	No Prokka Description
p06D1274_00086	Prodigal:2.6	69010-69978	969	Atpase AAA [Salmonella enterica]		p08D015_00086	Prodigal:2.6	68977-69945	969	Atpase AAA [Salmonella enterica]		p08OTH027_00087	Prodigal:2.6	69069-70037	969	Atpase AAA [Salmonella enterica]		p11OTH031_00086	Prodigal:2.6	68956-69924	969	Atpase AAA [Salmonella enterica]		p12OTH012_00083	Prodigal:2.6	69042-70010	969	Atpase AAA [Salmonella enterica]		p14OTH007_00084	Prodigal:2.6	69152-70120	969	Atpase AAA [Salmonella enterica]		pSEN_00056	Prodigal:2.6	41870-42838	969	Atpase AAA [Salmonella enterica]		pSLT_00097	Prodigal:2.6	76430-77398	969	Atpase AAA [Salmonella enterica]
p06D1274_00086	prokka	69010-69978	969	No Prokka Description		p08D015_00086	prokka	68977-69945	969	No Prokka Description		p08OTH027_00087	prokka	69069-70037	969	No Prokka Description		p11OTH031_00086	prokka	68956-69924	969	No Prokka Description		p12OTH012_00083	prokka	69042-70010	969	No Prokka Description		p14OTH007_00084	prokka	69152-70120	969	No Prokka Description		pSEN_00056	prokka	41870-42838	969	No Prokka Description		pSLT_00097	prokka	76430-77398	969	No Prokka Description
p06D1274_00087	Prodigal:2.6	70167-70784	618	Is630 family transposase [Salmonella enterica]		p08D015_00087	Prodigal:2.6	70134-71171	1038	Is630 family transposase [Salmonella enterica]		p08OTH027_00088	Prodigal:2.6	70226-70843	618	Is630 family transposase [Salmonella enterica]		p11OTH031_00087	Prodigal:2.6	70113-71150	1038	Is630 family transposase [Salmonella enterica]		p12OTH012_00084	Prodigal:2.6	70199-71236	1038	Is630 family transposase [Salmonella enterica]		p14OTH007_00085	Prodigal:2.6	70309-71346	1038	Is630 family transposase [Salmonella enterica]		pSEN_00057	Prodigal:2.6	43027-44064	1038	Is630 family transposase [Salmonella enterica]		pSLT_00098	Prodigal:2.6	77587-78624	1038	Is630 family transposase [Salmonella enterica]
p06D1274_00087	prokka	70167-70784	618	No Prokka Description		p08D015_00087	prokka	70134-71171	1038	No Prokka Description		p08OTH027_00088	prokka	70226-70843	618	No Prokka Description		p11OTH031_00087	prokka	70113-71150	1038	No Prokka Description		p12OTH012_00084	prokka	70199-71236	1038	No Prokka Description		p14OTH007_00085	prokka	70309-71346	1038	No Prokka Description		pSEN_00057	prokka	43027-44064	1038	No Prokka Description		pSLT_00098	prokka	77587-78624	1038	No Prokka Description
p06D1274_00088	Prodigal:2.6	71411-71542	132	putative protein [Salmonella enterica]		p08D015_00088	Prodigal:2.6	71379-71510	132	putative protein [Salmonella enterica]		p08OTH027_00089	Prodigal:2.6	71470-71601	132	putative protein [Salmonella enterica]		p11OTH031_00088	Prodigal:2.6	71358-71489	132	putative protein [Salmonella enterica]		p12OTH012_00085	Prodigal:2.6	71444-71575	132	putative protein [Salmonella enterica]		p14OTH007_00086	Prodigal:2.6	71554-71685	132	putative protein [Salmonella enterica]		pSEN_00058	Prodigal:2.6	44272-44403	132	putative protein [Salmonella enterica]		pSLT_00099	Prodigal:2.6	78832-78963	132	putative protein [Salmonella enterica]
p06D1274_00088	prokka	71411-71542	132	No Prokka Description		p08D015_00088	prokka	71379-71510	132	No Prokka Description		p08OTH027_00089	prokka	71470-71601	132	No Prokka Description		p11OTH031_00088	prokka	71358-71489	132	No Prokka Description		p12OTH012_00085	prokka	71444-71575	132	No Prokka Description		p14OTH007_00086	prokka	71554-71685	132	No Prokka Description		pSEN_00058	prokka	44272-44403	132	No Prokka Description		pSLT_00099	prokka	78832-78963	132	No Prokka Description
p06D1274_00089	Prodigal:2.6	71811-72704	894	Virulence genes transcriptional activator		p08D015_00089	Prodigal:2.6	71779-72672	894	Virulence genes transcriptional activator		p08OTH027_00090	Prodigal:2.6	71869-72762	894	Virulence genes transcriptional activator		p11OTH031_00089	Prodigal:2.6	71758-72651	894	Virulence genes transcriptional activator		p12OTH012_00086	Prodigal:2.6	71844-72737	894	Virulence genes transcriptional activator		p14OTH007_00087	Prodigal:2.6	71954-72847	894	Virulence genes transcriptional activator		pSEN_00059	Prodigal:2.6	44672-45565	894	Virulence genes transcriptional activator		pSLT_00100	Prodigal:2.6	79233-80126	894	Virulence genes transcriptional activator
p06D1274_00089	prokka	71811-72704	894	mkaC		p08D015_00089	prokka	71779-72672	894	mkaC		p08OTH027_00090	prokka	71869-72762	894	mkaC		p11OTH031_00089	prokka	71758-72651	894	mkaC		p12OTH012_00086	prokka	71844-72737	894	mkaC		p14OTH007_00087	prokka	71954-72847	894	mkaC		pSEN_00059	prokka	44672-45565	894	mkaC		pSLT_00100	prokka	79233-80126	894	mkaC
p06D1274_00090	Prodigal:2.6	72878-73042	165	Lysozyme RrrD		p08D015_00090	Prodigal:2.6	72846-73010	165	Lysozyme RrrD		p08OTH027_00091	Prodigal:2.6	72936-73100	165	Lysozyme RrrD		p11OTH031_00090	Prodigal:2.6	72825-72989	165	Lysozyme RrrD		p12OTH012_00087	Prodigal:2.6	72911-73075	165	Lysozyme RrrD		p14OTH007_00088	Prodigal:2.6	73021-73185	165	Lysozyme RrrD		pSEN_00060	Prodigal:2.6	45739-45903	165	Lysozyme RrrD		pSLT_00101	Prodigal:2.6	80300-80464	165	Lysozyme RrrD
p06D1274_00090	prokka	72878-73042	165	rrrD		p08D015_00090	prokka	72846-73010	165	rrrD		p08OTH027_00091	prokka	72936-73100	165	rrrD		p11OTH031_00090	prokka	72825-72989	165	rrrD		p12OTH012_00087	prokka	72911-73075	165	rrrD		p14OTH007_00088	prokka	73021-73185	165	rrrD		pSEN_00060	prokka	45739-45903	165	rrrD		pSLT_00101	prokka	80300-80464	165	rrrD
p06D1274_00091	Prodigal:2.6	73216-73983	768	28.1 kDa virulence protein		p08D015_00091	Prodigal:2.6	73184-73951	768	28.1 kDa virulence protein		p08OTH027_00092	Prodigal:2.6	73274-74041	768	28.1 kDa virulence protein		p11OTH031_00091	Prodigal:2.6	73163-73930	768	28.1 kDa virulence protein		p12OTH012_00088	Prodigal:2.6	73249-74016	768	28.1 kDa virulence protein		p14OTH007_00089	Prodigal:2.6	73359-74126	768	28.1 kDa virulence protein		pSEN_00061	Prodigal:2.6	46077-46844	768	28.1 kDa virulence protein		pSLT_00102	Prodigal:2.6	80638-81405	768	28.1 kDa virulence protein
p06D1274_00091	prokka	73216-73983	768	mkaB		p08D015_00091	prokka	73184-73951	768	mkaB		p08OTH027_00092	prokka	73274-74041	768	mkaB		p11OTH031_00091	prokka	73163-73930	768	mkaB		p12OTH012_00088	prokka	73249-74016	768	mkaB		p14OTH007_00089	prokka	73359-74126	768	mkaB		pSEN_00061	prokka	46077-46844	768	mkaB		pSLT_00102	prokka	80638-81405	768	mkaB
p06D1274_00092	Prodigal:2.6	73922-74134	213	putative protein [Salmonella enterica subsp. arizonae]		p08D015_00092	Prodigal:2.6	73890-74102	213	putative protein [Salmonella enterica subsp. arizonae]		p08OTH027_00093	Prodigal:2.6	73980-74192	213	putative protein [Salmonella enterica subsp. arizonae]		p11OTH031_00092	Prodigal:2.6	73869-74081	213	putative protein [Salmonella enterica subsp. arizonae]		p12OTH012_00089	Prodigal:2.6	73955-74167	213	putative protein [Salmonella enterica subsp. arizonae]		p14OTH007_00090	Prodigal:2.6	74065-74277	213	putative protein [Salmonella enterica subsp. arizonae]		pSEN_00062	Prodigal:2.6	46783-46995	213	putative protein [Salmonella enterica subsp. arizonae]		pSLT_00103	Prodigal:2.6	81344-81556	213	putative protein [Salmonella enterica subsp. arizonae]
p06D1274_00092	prokka	73922-74134	213	No Prokka Description		p08D015_00092	prokka	73890-74102	213	No Prokka Description		p08OTH027_00093	prokka	73980-74192	213	No Prokka Description		p11OTH031_00092	prokka	73869-74081	213	No Prokka Description		p12OTH012_00089	prokka	73955-74167	213	No Prokka Description		p14OTH007_00090	prokka	74065-74277	213	No Prokka Description		pSEN_00062	prokka	46783-46995	213	No Prokka Description		pSLT_00103	prokka	81344-81556	213	No Prokka Description
p06D1274_00093	Prodigal:2.6	74165-75940	1776	Mono(ADP-ribosyl)transferase SpvB		p08D015_00093	Prodigal:2.6	74133-75908	1776	Mono(ADP-ribosyl)transferase SpvB		p08OTH027_00094	Prodigal:2.6	74223-75998	1776	Mono(ADP-ribosyl)transferase SpvB		p11OTH031_00093	Prodigal:2.6	74112-75887	1776	Mono(ADP-ribosyl)transferase SpvB		p12OTH012_00090	Prodigal:2.6	74198-75973	1776	Mono(ADP-ribosyl)transferase SpvB		p14OTH007_00091	Prodigal:2.6	74308-76083	1776	Mono(ADP-ribosyl)transferase SpvB		pSEN_00063	Prodigal:2.6	47026-48801	1776	Mono(ADP-ribosyl)transferase SpvB		pSLT_00104	Prodigal:2.6	81587-83362	1776	Mono(ADP-ribosyl)transferase SpvB
p06D1274_00093	prokka	74165-75940	1776	spvB		p08D015_00093	prokka	74133-75908	1776	spvB		p08OTH027_00094	prokka	74223-75998	1776	spvB		p11OTH031_00093	prokka	74112-75887	1776	spvB		p12OTH012_00090	prokka	74198-75973	1776	spvB		p14OTH007_00091	prokka	74308-76083	1776	spvB		pSEN_00063	prokka	47026-48801	1776	spvB		pSLT_00104	prokka	81587-83362	1776	spvB
p06D1274_00094	Prodigal:2.6	76221-76946	726	MAPK phosphothreonine lyase		p08D015_00094	Prodigal:2.6	76189-76914	726	MAPK phosphothreonine lyase		p08OTH027_00095	Prodigal:2.6	76279-77004	726	MAPK phosphothreonine lyase		p11OTH031_00094	Prodigal:2.6	76168-76893	726	MAPK phosphothreonine lyase		p12OTH012_00091	Prodigal:2.6	76254-76979	726	MAPK phosphothreonine lyase		p14OTH007_00092	Prodigal:2.6	76364-77089	726	MAPK phosphothreonine lyase		pSEN_00064	Prodigal:2.6	49082-49807	726	MAPK phosphothreonine lyase		pSLT_00105	Prodigal:2.6	83644-84369	726	MAPK phosphothreonine lyase
p06D1274_00094	prokka	76221-76946	726	spvC		p08D015_00094	prokka	76189-76914	726	spvC		p08OTH027_00095	prokka	76279-77004	726	spvC		p11OTH031_00094	prokka	76168-76893	726	spvC		p12OTH012_00091	prokka	76254-76979	726	spvC		p14OTH007_00092	prokka	76364-77089	726	spvC		pSEN_00064	prokka	49082-49807	726	spvC		pSLT_00105	prokka	83644-84369	726	spvC
p06D1274_00095	Prodigal:2.6	77208-77753	546	Virulence protein vsdE		p08D015_00095	Prodigal:2.6	77176-77721	546	Virulence protein vsdE		p08OTH027_00096	Prodigal:2.6	77266-77811	546	Virulence protein vsdE		p11OTH031_00095	Prodigal:2.6	77155-77700	546	Virulence protein vsdE		p12OTH012_00092	Prodigal:2.6	77241-77786	546	Virulence protein vsdE		p14OTH007_00093	Prodigal:2.6	77351-77899	549	Virulence protein vsdE		pSEN_00065	Prodigal:2.6	50069-50719	651	Virulence protein vsdE		pSLT_00106	Prodigal:2.6	84630-85280	651	Virulence protein vsdE
p06D1274_00095	prokka	77208-77753	546	vsdE		p08D015_00095	prokka	77176-77721	546	vsdE		p08OTH027_00096	prokka	77266-77811	546	vsdE		p11OTH031_00095	prokka	77155-77700	546	vsdE		p12OTH012_00092	prokka	77241-77786	546	vsdE		p14OTH007_00093	prokka	77351-77899	549	vsdE		pSEN_00065	prokka	50069-50719	651	vsdE		pSLT_00106	prokka	84630-85280	651	vsdE
p06D1274_00096	Prodigal:2.6	77986-78411	426	Is200/is605 family transposase [Providencia stuartii]		p08D015_00096	Prodigal:2.6	77954-78379	426	Is200/is605 family transposase [Providencia stuartii]		p08OTH027_00097	Prodigal:2.6	78044-78469	426	Is200/is605 family transposase [Providencia stuartii]		p11OTH031_00096	Prodigal:2.6	77933-78358	426	Is200/is605 family transposase [Providencia stuartii]		p12OTH012_00093	Prodigal:2.6	78019-78444	426	Is200/is605 family transposase [Providencia stuartii]		p14OTH007_00094	Prodigal:2.6	78132-78557	426	Is200/is605 family transposase [Providencia stuartii]		pSEN_00066	Prodigal:2.6	50846-51271	426	Is200/is605 family transposase [Salmonella enterica]		pSLT_00107	Prodigal:2.6	85407-85649	243	Is200/is605 family transposase%2C partial [Salmonella enterica]
p06D1274_00096	prokka	77986-78411	426	No Prokka Description		p08D015_00096	prokka	77954-78379	426	No Prokka Description		p08OTH027_00097	prokka	78044-78469	426	No Prokka Description		p11OTH031_00096	prokka	77933-78358	426	No Prokka Description		p12OTH012_00093	prokka	78019-78444	426	No Prokka Description		p14OTH007_00094	prokka	78132-78557	426	No Prokka Description		pSEN_00066	prokka	50846-51271	426	No Prokka Description		pSLT_00107	prokka	85407-85649	243	No Prokka Description
p06D1274_00097	Prodigal:2.6	78468-78809	342	Transposase [Escherichia coli]		p08D015_00097	Prodigal:2.6	78436-78777	342	Transposase [Escherichia coli]		p08OTH027_00098	Prodigal:2.6	78526-78867	342	Transposase [Escherichia coli]		p11OTH031_00097	Prodigal:2.6	78415-78756	342	Transposase [Escherichia coli]		p12OTH012_00094	Prodigal:2.6	78501-78842	342	Transposase [Escherichia coli]		p14OTH007_00095	Prodigal:2.6	78614-78955	342	Transposase [Escherichia coli]		pSEN_00067	Prodigal:2.6	51328-51678	351	Transposase [Salmonella enterica]		pSLT_00108	Prodigal:2.6	85888-86238	351	Transposase [Salmonella enterica]
p06D1274_00097	prokka	78468-78809	342	No Prokka Description		p08D015_00097	prokka	78436-78777	342	No Prokka Description		p08OTH027_00098	prokka	78526-78867	342	No Prokka Description		p11OTH031_00097	prokka	78415-78756	342	No Prokka Description		p12OTH012_00094	prokka	78501-78842	342	No Prokka Description		p14OTH007_00095	prokka	78614-78955	342	No Prokka Description		pSEN_00067	prokka	51328-51678	351	No Prokka Description		pSLT_00108	prokka	85888-86238	351	No Prokka Description
p06D1274_00098	Prodigal:2.6	78876-79436	561	Invasin		p08D015_00098	Prodigal:2.6	78844-79404	561	Invasin		p08OTH027_00099	Prodigal:2.6	78934-79494	561	Invasin		p11OTH031_00098	Prodigal:2.6	78823-79383	561	Invasin		p12OTH012_00095	Prodigal:2.6	78909-79469	561	Invasin		p14OTH007_00096	Prodigal:2.6	79022-79582	561	Invasin		pSEN_00068	Prodigal:2.6	51745-52305	561	Invasin		pSLT_00109	Prodigal:2.6	86305-86865	561	Invasin
p06D1274_00098	prokka	78876-79436	561	No Prokka Description		p08D015_00098	prokka	78844-79404	561	No Prokka Description		p08OTH027_00099	prokka	78934-79494	561	No Prokka Description		p11OTH031_00098	prokka	78823-79383	561	No Prokka Description		p12OTH012_00095	prokka	78909-79469	561	No Prokka Description		p14OTH007_00096	prokka	79022-79582	561	No Prokka Description		pSEN_00068	prokka	51745-52305	561	No Prokka Description		pSLT_00109	prokka	86305-86865	561	No Prokka Description
p06D1274_00099	Prodigal:2.6	79592-79879	288	putative protein [Salmonella enterica subsp. enterica serovar Typhimurium str. DT104]		p08D015_00099	Prodigal:2.6	79560-79847	288	putative protein [Salmonella enterica subsp. enterica serovar Typhimurium str. DT104]		p08OTH027_00100	Prodigal:2.6	79650-79937	288	putative protein [Salmonella enterica subsp. enterica serovar Typhimurium str. DT104]		p11OTH031_00099	Prodigal:2.6	79539-79826	288	putative protein [Salmonella enterica subsp. enterica serovar Typhimurium str. DT104]		p12OTH012_00096	Prodigal:2.6	79625-79912	288	putative protein [Salmonella enterica subsp. enterica serovar Typhimurium str. DT104]		p14OTH007_00097	Prodigal:2.6	79738-80025	288	putative protein [Salmonella enterica subsp. enterica serovar Typhimurium str. DT104]		pSEN_00069	Prodigal:2.6	52461-52748	288	putative protein [Salmonella enterica subsp. enterica serovar Typhimurium str. DT104]		pSLT_00110	Prodigal:2.6	87021-87308	288	putative protein [Salmonella enterica subsp. enterica serovar Typhimurium str. DT104]
p06D1274_00099	prokka	79592-79879	288	No Prokka Description		p08D015_00099	prokka	79560-79847	288	No Prokka Description		p08OTH027_00100	prokka	79650-79937	288	No Prokka Description		p11OTH031_00099	prokka	79539-79826	288	No Prokka Description		p12OTH012_00096	prokka	79625-79912	288	No Prokka Description		p14OTH007_00097	prokka	79738-80025	288	No Prokka Description		pSEN_00069	prokka	52461-52748	288	No Prokka Description		pSLT_00110	prokka	87021-87308	288	No Prokka Description
p06D1274_00100	Prodigal:2.6	80156-80641	486	Membrane protein [Salmonella enterica]		p08D015_00100	Prodigal:2.6	80124-80609	486	Membrane protein [Salmonella enterica]		p08OTH027_00101	Prodigal:2.6	80214-80699	486	Membrane protein [Salmonella enterica]		p11OTH031_00100	Prodigal:2.6	80060-80587	528	Membrane protein [Salmonella enterica]		p12OTH012_00097	Prodigal:2.6	80189-80674	486	Membrane protein [Salmonella enterica]		p14OTH007_00098	Prodigal:2.6	80302-80787	486	Membrane protein [Salmonella enterica]		pSEN_00070	Prodigal:2.6	53025-53510	486	Membrane protein [Salmonella enterica]		pSLT_00111	Prodigal:2.6	87585-88070	486	Membrane protein [Salmonella enterica]
p06D1274_00100	prokka	80156-80641	486	No Prokka Description		p08D015_00100	prokka	80124-80609	486	No Prokka Description		p08OTH027_00101	prokka	80214-80699	486	No Prokka Description		p11OTH031_00100	prokka	80060-80587	528	No Prokka Description		p12OTH012_00097	prokka	80189-80674	486	No Prokka Description		p14OTH007_00098	prokka	80302-80787	486	No Prokka Description		pSEN_00070	prokka	53025-53510	486	No Prokka Description		pSLT_00111	prokka	87585-88070	486	No Prokka Description
p06D1274_00101	Prodigal:2.6	80635-81123	489	Caif/grla family transcriptional regulator [Salmonella enterica]		p08D015_00101	Prodigal:2.6	80603-81091	489	Caif/grla family transcriptional regulator [Salmonella enterica]		p08OTH027_00102	Prodigal:2.6	80693-81181	489	Caif/grla family transcriptional regulator [Salmonella enterica]		p11OTH031_00101	Prodigal:2.6	80581-81069	489	Caif/grla family transcriptional regulator [Salmonella enterica]		p12OTH012_00098	Prodigal:2.6	80668-81156	489	Caif/grla family transcriptional regulator [Salmonella enterica]		p14OTH007_00099	Prodigal:2.6	80781-81269	489	Caif/grla family transcriptional regulator [Salmonella enterica]		pSEN_00071	Prodigal:2.6	53504-53992	489	Caif/grla family transcriptional regulator [Salmonella enterica]		pSLT_00112	Prodigal:2.6	88064-88552	489	Caif/grla family transcriptional regulator [Salmonella enterica]
p06D1274_00101	prokka	80635-81123	489	No Prokka Description		p08D015_00101	prokka	80603-81091	489	No Prokka Description		p08OTH027_00102	prokka	80693-81181	489	No Prokka Description		p11OTH031_00101	prokka	80581-81069	489	No Prokka Description		p12OTH012_00098	prokka	80668-81156	489	No Prokka Description		p14OTH007_00099	prokka	80781-81269	489	No Prokka Description		pSEN_00071	prokka	53504-53992	489	No Prokka Description		pSLT_00112	prokka	88064-88552	489	No Prokka Description
p06D1274_00102	Prodigal:2.6	81148-81861	714	Cyclic di-GMP phosphodiesterase PdeL		p08D015_00102	Prodigal:2.6	81116-81829	714	Cyclic di-GMP phosphodiesterase PdeL		p08OTH027_00103	Prodigal:2.6	81206-81919	714	Cyclic di-GMP phosphodiesterase PdeL		p11OTH031_00102	Prodigal:2.6	81094-81807	714	Cyclic di-GMP phosphodiesterase PdeL		p12OTH012_00099	Prodigal:2.6	81181-81894	714	Cyclic di-GMP phosphodiesterase PdeL		p14OTH007_00100	Prodigal:2.6	81294-82007	714	Cyclic di-GMP phosphodiesterase PdeL		pSEN_00072	Prodigal:2.6	54017-54730	714	Cyclic di-GMP phosphodiesterase PdeL		pSLT_00113	Prodigal:2.6	88739-89290	552	Cyclic di-GMP phosphodiesterase PdeL
p06D1274_00102	prokka	81148-81861	714	pdeL		p08D015_00102	prokka	81116-81829	714	pdeL		p08OTH027_00103	prokka	81206-81919	714	pdeL		p11OTH031_00102	prokka	81094-81807	714	pdeL		p12OTH012_00099	prokka	81181-81894	714	pdeL		p14OTH007_00100	prokka	81294-82007	714	pdeL		pSEN_00072	prokka	54017-54730	714	pdeL		pSLT_00113	prokka	88739-89290	552	pdeL
p06D1274_00103	Prodigal:2.6	81870-82652	783	Tyrosine recombinase XerD		p08D015_00103	Prodigal:2.6	81838-82620	783	Tyrosine recombinase XerD		p08OTH027_00104	Prodigal:2.6	81928-82710	783	Tyrosine recombinase XerD		p11OTH031_00103	Prodigal:2.6	81816-82598	783	Tyrosine recombinase XerD		p12OTH012_00100	Prodigal:2.6	81903-82685	783	Tyrosine recombinase XerD		p14OTH007_00101	Prodigal:2.6	82016-82798	783	Tyrosine recombinase XerD		pSEN_00073	Prodigal:2.6	54739-55521	783	Tyrosine recombinase XerD		pSLT_00114	Prodigal:2.6	89299-90081	783	Tyrosine recombinase XerD
p06D1274_00103	prokka	81870-82652	783	xerD		p08D015_00103	prokka	81838-82620	783	xerD		p08OTH027_00104	prokka	81928-82710	783	xerD		p11OTH031_00103	prokka	81816-82598	783	xerD		p12OTH012_00100	prokka	81903-82685	783	xerD		p14OTH007_00101	prokka	82016-82798	783	xerD		pSEN_00073	prokka	54739-55521	783	xerD		pSLT_00114	prokka	89299-90081	783	xerD
p06D1274_00104	Prodigal:2.6	82687-83208	522	3'-5' exonuclease [Salmonella enterica]		p08D015_00104	Prodigal:2.6	82655-83176	522	3'-5' exonuclease [Salmonella enterica]		p08OTH027_00105	Prodigal:2.6	82745-83266	522	3'-5' exonuclease [Salmonella enterica]		p11OTH031_00104	Prodigal:2.6	82633-83154	522	3'-5' exonuclease [Salmonella enterica]		p12OTH012_00101	Prodigal:2.6	82720-83241	522	3'-5' exonuclease [Salmonella enterica]		p14OTH007_00102	Prodigal:2.6	82833-83354	522	3'-5' exonuclease [Salmonella enterica]		pSEN_00074	Prodigal:2.6	55556-56077	522	3'-5' exonuclease [Salmonella enterica]		pSLT_00115	Prodigal:2.6	90116-90637	522	3'-5' exonuclease [Salmonella enterica]
p06D1274_00104	prokka	82687-83208	522	No Prokka Description		p08D015_00104	prokka	82655-83176	522	No Prokka Description		p08OTH027_00105	prokka	82745-83266	522	No Prokka Description		p11OTH031_00104	prokka	82633-83154	522	No Prokka Description		p12OTH012_00101	prokka	82720-83241	522	No Prokka Description		p14OTH007_00102	prokka	82833-83354	522	No Prokka Description		pSEN_00074	prokka	55556-56077	522	No Prokka Description		pSLT_00115	prokka	90116-90637	522	No Prokka Description
																																				pSEN_00075	Prodigal:2.6	56074-56364	291	Cytoplasmic protein [Salmonella enterica]		pSLT_00116	Prodigal:2.6	90634-90924	291	Cytoplasmic protein [Salmonella enterica]
																																				pSEN_00075	prokka	56074-56364	291	No Prokka Description		pSLT_00116	prokka	90634-90924	291	No Prokka Description
p06D1274_00105	Prodigal:2.6	83496-83801	306	Toxin CcdB		p08D015_00105	Prodigal:2.6	83464-83769	306	Toxin CcdB		p08OTH027_00106	Prodigal:2.6	83554-83859	306	Toxin CcdB		p11OTH031_00105	Prodigal:2.6	83442-83747	306	Toxin CcdB		p12OTH012_00102	Prodigal:2.6	83529-83834	306	Toxin CcdB		p14OTH007_00103	Prodigal:2.6	83642-83947	306	Toxin CcdB		pSEN_00076	Prodigal:2.6	56366-56671	306	Toxin CcdB		pSLT_00117	Prodigal:2.6	90926-91231	306	Toxin CcdB
p06D1274_00105	prokka	83496-83801	306	ccdB		p08D015_00105	prokka	83464-83769	306	ccdB		p08OTH027_00106	prokka	83554-83859	306	ccdB		p11OTH031_00105	prokka	83442-83747	306	ccdB		p12OTH012_00102	prokka	83529-83834	306	ccdB		p14OTH007_00103	prokka	83642-83947	306	ccdB		pSEN_00076	prokka	56366-56671	306	ccdB		pSLT_00117	prokka	90926-91231	306	ccdB
p06D1274_00106	Prodigal:2.6	83803-84021	219	Antitoxin CcdA		p08D015_00106	Prodigal:2.6	83771-83989	219	Antitoxin CcdA		p08OTH027_00107	Prodigal:2.6	83861-84079	219	Antitoxin CcdA		p11OTH031_00106	Prodigal:2.6	83749-83967	219	Antitoxin CcdA		p12OTH012_00103	Prodigal:2.6	83836-84054	219	Antitoxin CcdA		p14OTH007_00104	Prodigal:2.6	83949-84167	219	Antitoxin CcdA		pSEN_00077	Prodigal:2.6	56673-56891	219	Antitoxin CcdA		pSLT_00118	Prodigal:2.6	91233-91451	219	Antitoxin CcdA
p06D1274_00106	prokka	83803-84021	219	ccdA		p08D015_00106	prokka	83771-83989	219	ccdA		p08OTH027_00107	prokka	83861-84079	219	ccdA		p11OTH031_00106	prokka	83749-83967	219	ccdA		p12OTH012_00103	prokka	83836-84054	219	ccdA		p14OTH007_00104	prokka	83949-84167	219	ccdA		pSEN_00077	prokka	56673-56891	219	ccdA		pSLT_00118	prokka	91233-91451	219	ccdA
p06D1274_00107	Prodigal:2.6	84731-85219	489	putative protein [Salmonella enterica subsp. enterica serovar Bovismorbificans]		p08D015_00107	Prodigal:2.6	84699-85187	489	putative protein [Salmonella enterica subsp. enterica serovar Bovismorbificans]		p08OTH027_00108	Prodigal:2.6	84789-85277	489	putative protein [Salmonella enterica subsp. enterica serovar Bovismorbificans]		p11OTH031_00107	Prodigal:2.6	84677-85165	489	putative protein [Salmonella enterica subsp. enterica serovar Bovismorbificans]		p12OTH012_00104	Prodigal:2.6	84764-85252	489	putative protein [Salmonella enterica subsp. enterica serovar Bovismorbificans]		p14OTH007_00105	Prodigal:2.6	84877-85365	489	putative protein [Salmonella enterica subsp. enterica serovar Bovismorbificans]		pSEN_00078	Prodigal:2.6	57600-58088	489	putative protein [Salmonella enterica subsp. enterica serovar Bovismorbificans]		pSLT_00119	Prodigal:2.6	92160-92648	489	putative protein [Salmonella enterica subsp. enterica serovar Bovismorbificans]
p06D1274_00107	prokka	84731-85219	489	No Prokka Description		p08D015_00107	prokka	84699-85187	489	No Prokka Description		p08OTH027_00108	prokka	84789-85277	489	No Prokka Description		p11OTH031_00107	prokka	84677-85165	489	No Prokka Description		p12OTH012_00104	prokka	84764-85252	489	No Prokka Description		p14OTH007_00105	prokka	84877-85365	489	No Prokka Description		pSEN_00078	prokka	57600-58088	489	No Prokka Description		pSLT_00119	prokka	92160-92648	489	No Prokka Description
Discrepancies
p06D1274_00013	Prodigal:2.6	10371-10943	573	Thiol:disulfide interchange protein [Salmonella enterica]								p08OTH027_00013	Prodigal:2.6	10289-10942	654	Thiol:disulfide interchange protein [Salmonella enterica]		p11OTH031_00013	Prodigal:2.6	10290-10529	240	Thiol:disulfide interchange protein [Salmonella enterica]		p12OTH012_00013	Prodigal:2.6	10290-10727	438	Thiol:disulfide interchange protein [Salmonella enterica]		p14OTH007_00013	Prodigal:2.6	10290-10943	654	Thiol:disulfide interchange protein [Salmonella enterica]
																		p11OTH031_00014	Prodigal:2.6	10593-10940	348	Thiol:disulfide interchange protein DsbA
p06D1274_00014	Prodigal:2.6	10894-11079	186	putative protein [Salmonella enterica subsp. enterica serovar Typhi]		p08D015_00013	Prodigal:2.6	10888-11142	255	putative protein [Salmonella enterica subsp. enterica serovar Typhi]		p08OTH027_00014	Prodigal:2.6	10893-11078	186	putative protein [Salmonella enterica subsp. enterica serovar Typhi]		p11OTH031_00015	Prodigal:2.6	10891-11076	186	putative protein [Salmonella enterica subsp. enterica serovar Typhi]								p14OTH007_00014	Prodigal:2.6	10894-11079	186	putative protein [Salmonella enterica subsp. enterica serovar Typhi]
p06D1274_00015	Prodigal:2.6	11130-11975	846	putative protein YjiK		p08D015_00014	Prodigal:2.6	11237-11491	255	putative protein YjiK		p08OTH027_00015	Prodigal:2.6	11129-11974	846	putative protein YjiK		p11OTH031_00016	Prodigal:2.6	11127-11615	489	putative protein YjiK		p12OTH012_00014	Prodigal:2.6	11331-11951	621	putative protein YjiK		p14OTH007_00015	Prodigal:2.6	11130-11975	846	putative protein YjiK
						p08D015_00015	Prodigal:2.6	11445-11606	162	hypothetical protein								p11OTH031_00016	SignalP:4.1	11127-11189	63	putative signal peptide
						p08D015_00016	Prodigal:2.6	11560-11964	405	putative protein YjiK								p11OTH031_00017	Prodigal:2.6	11615-11974	360	putative protein YjiK
p06D1274_00017	Prodigal:2.6	12889-13647	759	HTH-type transcriptional regulator GadX		p08D015_00018	Prodigal:2.6	12878-13636	759	HTH-type transcriptional regulator GadX		p08OTH027_00017	Prodigal:2.6	13156-13644	489	HTH-type transcriptional regulator GadX		p11OTH031_00019	Prodigal:2.6	12888-13646	759	HTH-type transcriptional regulator GadX		p12OTH012_00016	Prodigal:2.6	12865-13623	759	HTH-type transcriptional regulator GadX		p14OTH007_00017	Prodigal:2.6	12889-13647	759	HTH-type transcriptional regulator GadX
p06D1274_00018	Prodigal:2.6	13634-13882	249	hypothetical protein								p08OTH027_00018	Prodigal:2.6	13631-13879	249	hypothetical protein
p06D1274_00020	Prodigal:2.6	14823-15692	870	Incfii family plasmid replication initiator RepA [Salmonella enterica]		p08D015_00020	Prodigal:2.6	14814-15683	870	Incfii family plasmid replication initiator RepA [Salmonella enterica]		p08OTH027_00020	Prodigal:2.6	14820-15689	870	Incfii family plasmid replication initiator RepA [Salmonella enterica]		p11OTH031_00021	Prodigal:2.6	14824-15693	870	Incfii family plasmid replication initiator RepA [Salmonella enterica]		p12OTH012_00018	Prodigal:2.6	14901-15671	771	Incfii family plasmid replication initiator RepA [Salmonella enterica]		p14OTH007_00019	Prodigal:2.6	14825-15694	870	Incfii family plasmid replication initiator RepA [Salmonella enterica]
p06D1274_00023	Prodigal:2.6	16457-16780	324	Phospholipase D		p08D015_00023	Prodigal:2.6	16448-16627	180	hypothetical protein		p08OTH027_00023	Prodigal:2.6	16454-16633	180	hypothetical protein		p11OTH031_00024	Prodigal:2.6	16458-16769	312	Phospholipase D		p12OTH012_00021	Prodigal:2.6	16436-16615	180	hypothetical protein		p14OTH007_00022	Prodigal:2.6	16459-16776	318	Phospholipase D
						p08D015_00024	Prodigal:2.6	16644-16754	111	hypothetical protein
p06D1274_00028	Prodigal:2.6	19020-20222	1203	Multifunctional conjugation protein TraI		p08D015_00029	Prodigal:2.6	18994-24252	5259	Multifunctional conjugation protein TraI		p08OTH027_00028	Prodigal:2.6	19016-24274	5259	Multifunctional conjugation protein TraI		p11OTH031_00029	Prodigal:2.6	19009-24267	5259	Multifunctional conjugation protein TraI		p12OTH012_00026	Prodigal:2.6	18987-24245	5259	Multifunctional conjugation protein TraI		p14OTH007_00027	Prodigal:2.6	19016-24274	5259	Multifunctional conjugation protein TraI
p06D1274_00029	Prodigal:2.6	20198-24277	4080	Multifunctional conjugation protein TraI
p06D1274_00032	Prodigal:2.6	24993-27209	2217	Coupling protein TraD		p08D015_00032	Prodigal:2.6	24968-27175	2208	Coupling protein TraD		p08OTH027_00031	Prodigal:2.6	24990-25190	201	Coupling protein TraD		p11OTH031_00032	Prodigal:2.6	24983-27154	2172	Coupling protein TraD		p12OTH012_00029	Prodigal:2.6	24961-27240	2280	Coupling protein TraD		p14OTH007_00030	Prodigal:2.6	24990-27350	2361	Coupling protein TraD
												p08OTH027_00032	Prodigal:2.6	25226-27268	2043	Coupling protein TraD
p06D1274_00042	Prodigal:2.6	35110-35586	477	Cytosine permease [Burkholderia thailandensis]		p08D015_00042	Prodigal:2.6	35076-35552	477	Cytosine permease [Burkholderia thailandensis]		p08OTH027_00042	Prodigal:2.6	35169-35468	300	Cytosine permease [Burkholderia thailandensis]		p11OTH031_00042	Prodigal:2.6	35055-35531	477	Cytosine permease [Burkholderia thailandensis]		p12OTH012_00039	Prodigal:2.6	35141-35617	477	Cytosine permease [Burkholderia thailandensis]		p14OTH007_00040	Prodigal:2.6	35251-35727	477	Cytosine permease [Burkholderia thailandensis]
												p08OTH027_00043	Prodigal:2.6	35522-35644	123	Cytosine permease [Burkholderia thailandensis]
p06D1274_00087	Prodigal:2.6	70167-70784	618	Is630 family transposase [Salmonella enterica]		p08D015_00087	Prodigal:2.6	70134-71171	1038	Is630 family transposase [Salmonella enterica]		p08OTH027_00088	Prodigal:2.6	70226-70843	618	Is630 family transposase [Salmonella enterica]		p11OTH031_00087	Prodigal:2.6	70113-71150	1038	Is630 family transposase [Salmonella enterica]		p12OTH012_00084	Prodigal:2.6	70199-71236	1038	Is630 family transposase [Salmonella enterica]		p14OTH007_00085	Prodigal:2.6	70309-71346	1038	Is630 family transposase [Salmonella enterica]
p06D1274_00095	Prodigal:2.6	77208-77753	546	Virulence protein vsdE		p08D015_00095	Prodigal:2.6	77176-77721	546	Virulence protein vsdE		p08OTH027_00096	Prodigal:2.6	77266-77811	546	Virulence protein vsdE		p11OTH031_00095	Prodigal:2.6	77155-77700	546	Virulence protein vsdE		p12OTH012_00092	Prodigal:2.6	77241-77786	546	Virulence protein vsdE		p14OTH007_00093	Prodigal:2.6	77351-77899	549	Virulence protein vsdE
p06D1274_00100	Prodigal:2.6	80156-80641	486	Membrane protein [Salmonella enterica]		p08D015_00100	Prodigal:2.6	80124-80609	486	Membrane protein [Salmonella enterica]		p08OTH027_00101	Prodigal:2.6	80214-80699	486	Membrane protein [Salmonella enterica]		p11OTH031_00100	Prodigal:2.6	80060-80587	528	Membrane protein [Salmonella enterica]		p12OTH012_00097	Prodigal:2.6	80189-80674	486	Membrane protein [Salmonella enterica]		p14OTH007_00098	Prodigal:2.6	80302-80787	486	Membrane protein [Salmonella enterica]
